# Supplementary material for: Successful development of a method for the incorporation of Fmoc-Arg(Pbf)-OH in solid-phase peptide synthesis using N-butylpyrrolidinone (NBP) as solvent
Source: Royal Society of Chemistry journal article supplement (doi:10.1039/c9gc03784e), 2020-01-01

## Supporting Information

### **Successful Development of a Method for the Incorporation of Fmoc-Arg(Pbf)-OH in Solid-Phase Peptide Synthesis using N-Butylpyrrolidinone (NBP) as Solvent**

Beatriz G. de la Torre, <sup>\*a</sup> Ashish Kumar,<sup>a,b</sup> Mahama Alhassan,<sup>b</sup> Christoph Bucher,<sup>c</sup> Fernando Albericio, <sup>\*b,d,e</sup> John Lopez <sup>\*c</sup>,

<sup>a</sup>KwaZulu-Natal Research Innovation and Sequencing Platform (KRISP), School of Laboratory Medicine and Medical Sciences, College of Health Sciences, University of KwaZulu-Natal, Durban 4041, South Africa

<sup>b</sup>Peptide Science Laboratory, School of Chemistry and Physics, University of KwaZulu-Natal, Durban 4001, South Africa

<sup>c</sup>Novartis Pharma AG, Novartis Campus Campus, WSJ-145-5.51, CH-4056 Basel, Switzerland;

<sup>d</sup>CIBER-BBN, Networking Centre on Bioengineering, Biomaterials and Nanomedicine, Barcelona Science Park, University of Barcelona, 08028 Barcelona, Spain

<sup>e</sup>Department of Organic Chemistry, University of Barcelona, 08028 Barcelona, Spain

## Table of content

|   |                                                                                                                                                                    |   |         |
|---|--------------------------------------------------------------------------------------------------------------------------------------------------------------------|---|---------|
| 1 | <b>General Information</b>                                                                                                                                         | : |         |
| 2 | <b>HPLC: Supernatant analysis of <math>\delta</math>-lactamization study [Fmoc-Arg(Pbf)-OH : DIC : OxymaPure] in different conditions after 0, 30, 60, 120 min</b> | : | S1-S15  |
| 3 | <b>HPLC- Coupling quantification of Tripeptide (H-GFL-NH<sub>2</sub>) vs Tetrapeptide (H-RGFL-NH<sub>2</sub>) after 120 min in different conditions</b>            | : | S16-S24 |
| 4 | <b>HPLC: SPPS of Linear precursor of RGD Peptide (H-DfKRG-OH)</b>                                                                                                  | : | S25-S27 |

## General Information

All reagents and solvents were purchased from commercial suppliers and used without further purification. Fmoc amino acids, Fmoc-Rink Amide AM resin (loading 0.74 mmol/g) and 2-CTC resin were purchased from Iris Biotech. NBP (TamiSolveNxG) was purchased from Eastman, OxymaPure was a gift from Luxembourg Biotech., and *N,N*-Diisopropylethylamine (DIEA) and 4-methylpiperidine were supplied by Sigma-Aldrich. Organic solvents Dimethylformamide (DMF), 2-Methyltetrahydrofuran (2-MeTHF), cyclopentylmethyl ether (CPME) and HPLC quality acetonitrile (CH<sub>3</sub>CN) were purchased from Merck. Milli-Q water was used for RP-HPLC analyses. Analytical HPLC was performed on an Agilent 1100 system using a Phenomenex Aeris<sup>TM</sup>C18 (3.6 $\mu$ m, 4.6  $\times$  150 mm) column, with flow rate of 1.0 mL/min and UV detection at 220 nm. Solvent A: 0.1% TFA in H<sub>2</sub>O; Solvent B: 0.1% TFA in CH<sub>3</sub>CN.

## HPLC Method:

Supernatant analysis of  $\delta$ -lactamization study: 30–95% B into A in 15 min.

Coupling quantification: 10–25% B into A

Linear precursor of RGD Peptide (H-DfKRG-OH): 5–20% B into A

**HPLC-S1.** Fmoc-Arg(Pbf)-OH : DIC : OxymaPure [1:1:1], at RT, in DMF, in absence of nucleophile.

0 min

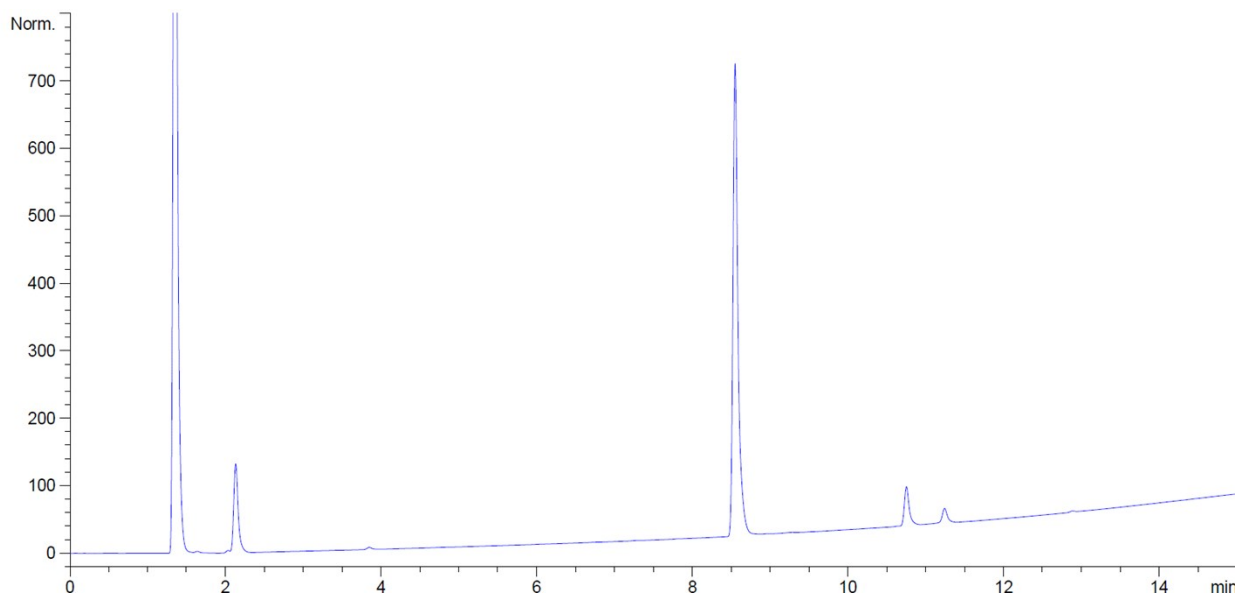

30 min

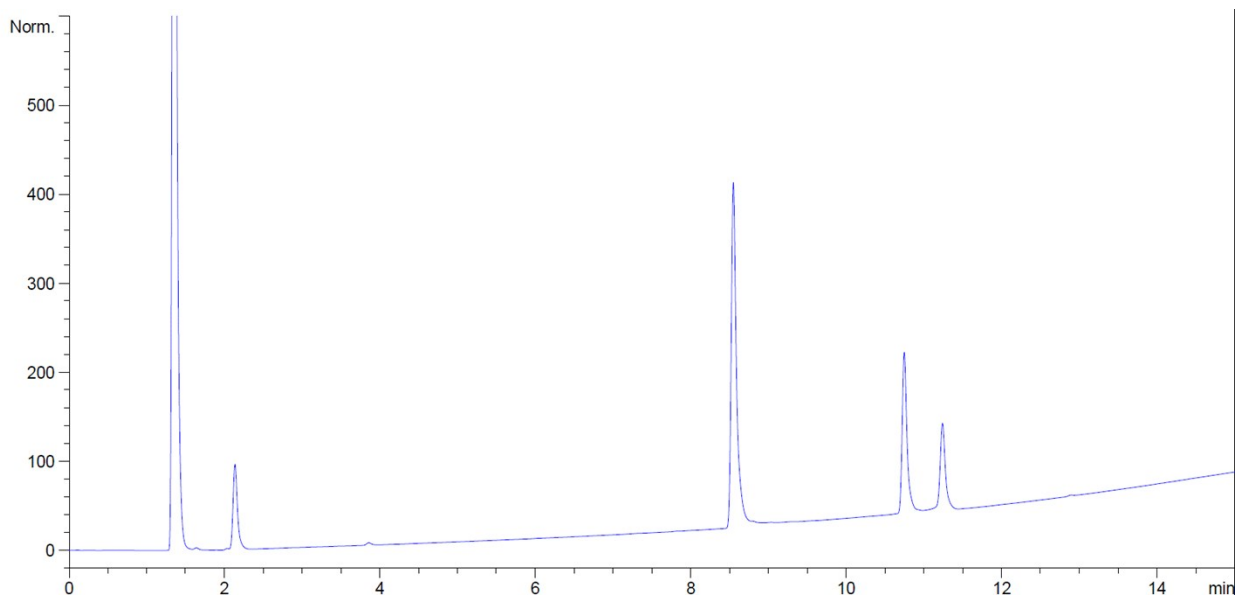

60 min

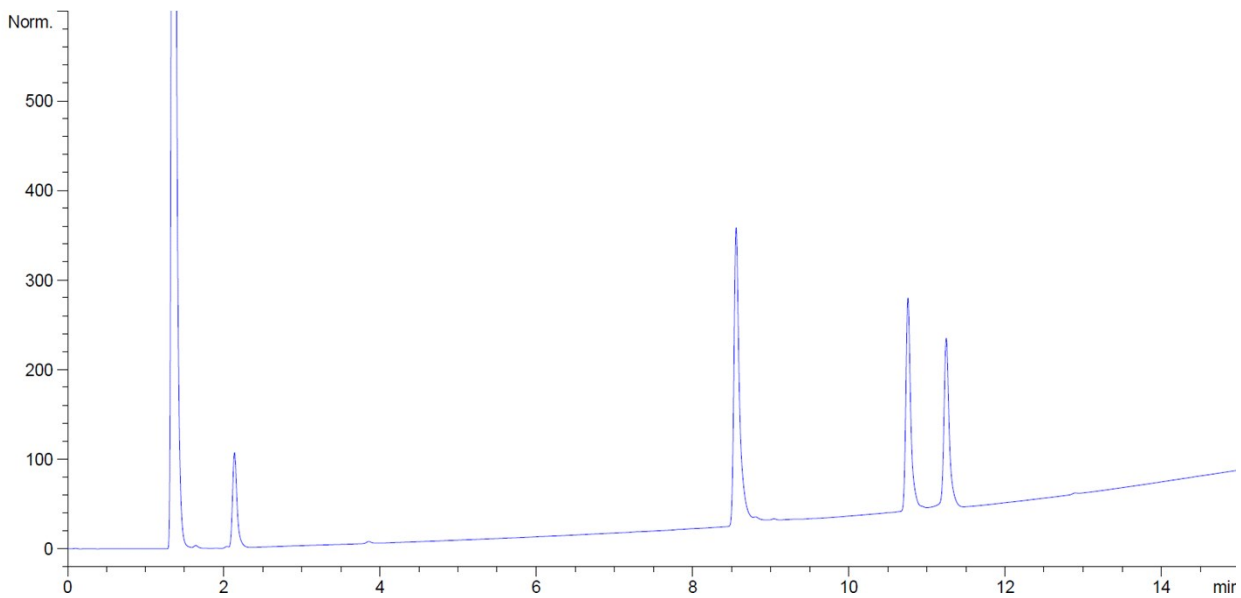

120 min

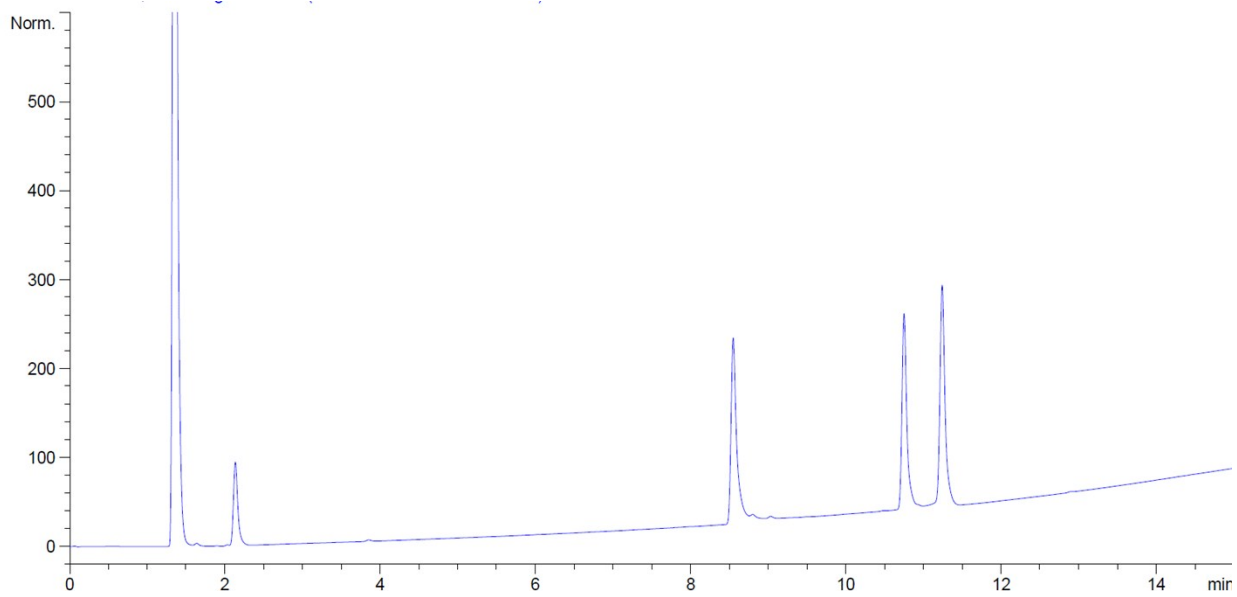

**HPLC-S2.** Fmoc-Arg(Pbf)-OH : DIC : OxymaPure [1:1:1], at RT, in NBP, in absence of nucleophile.

0 min

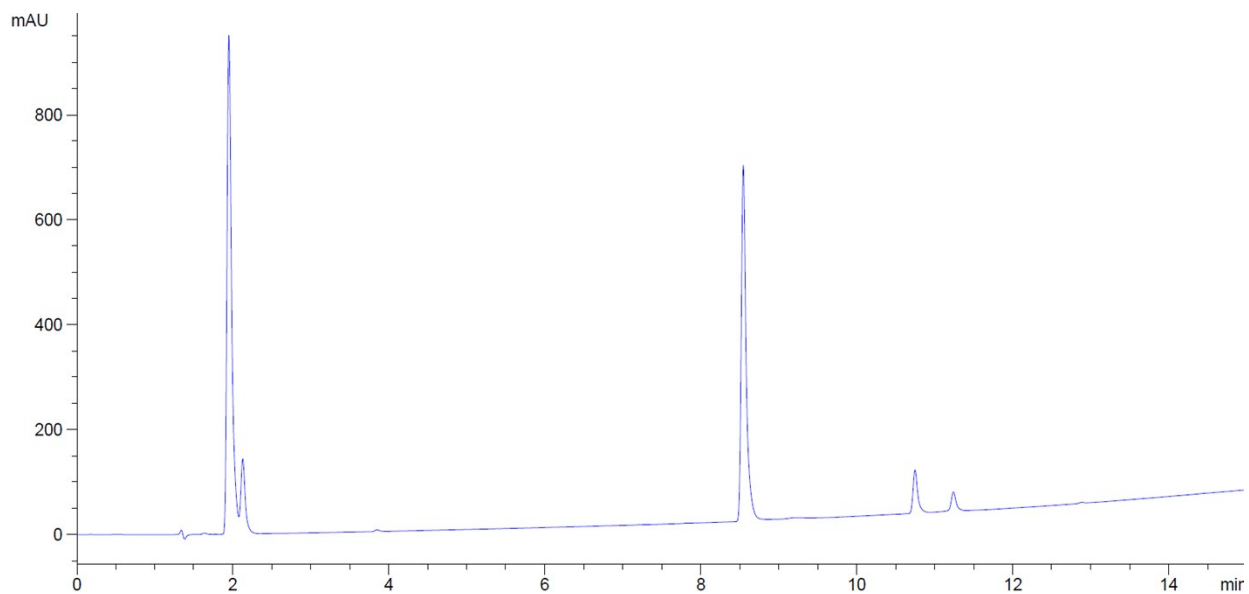

30 min

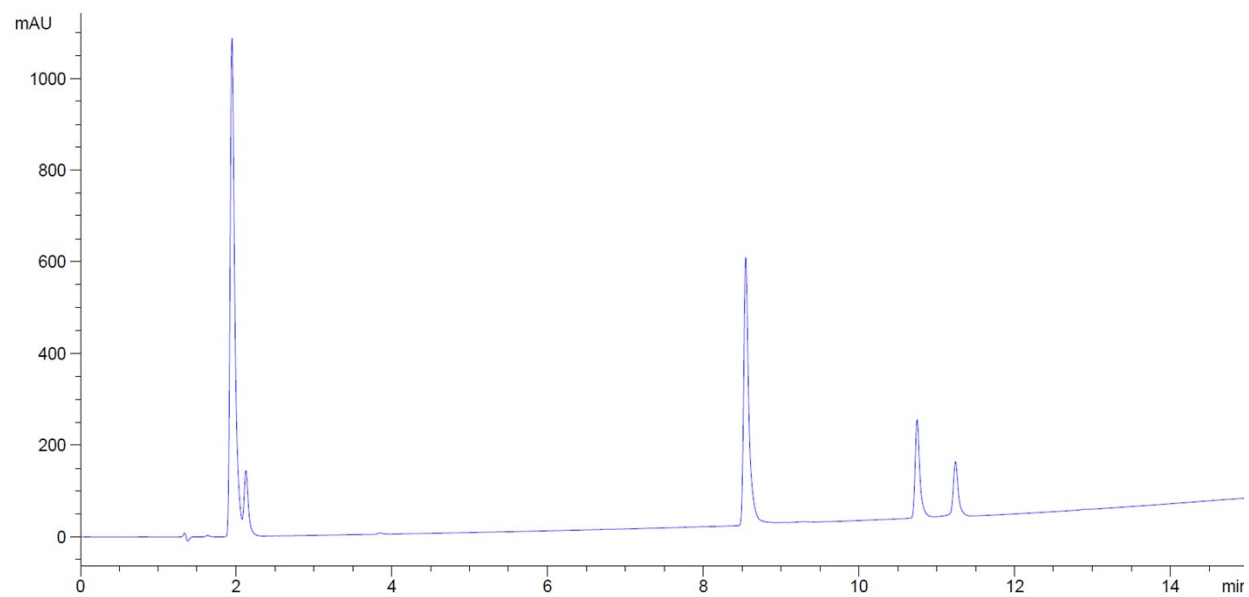

60 min

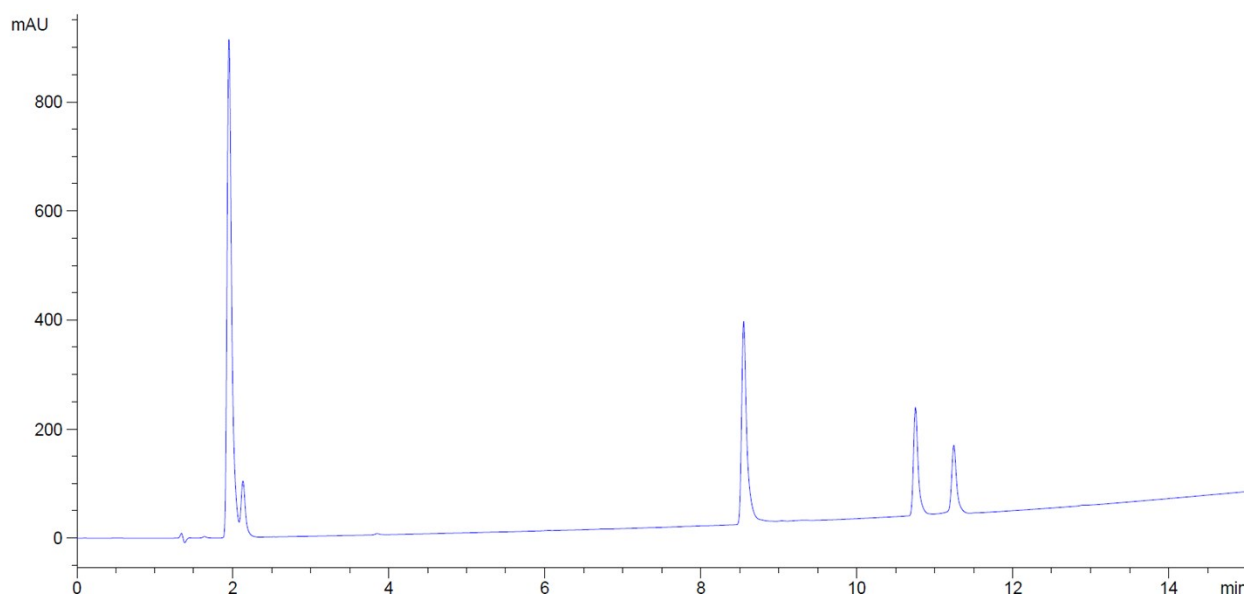

120 min

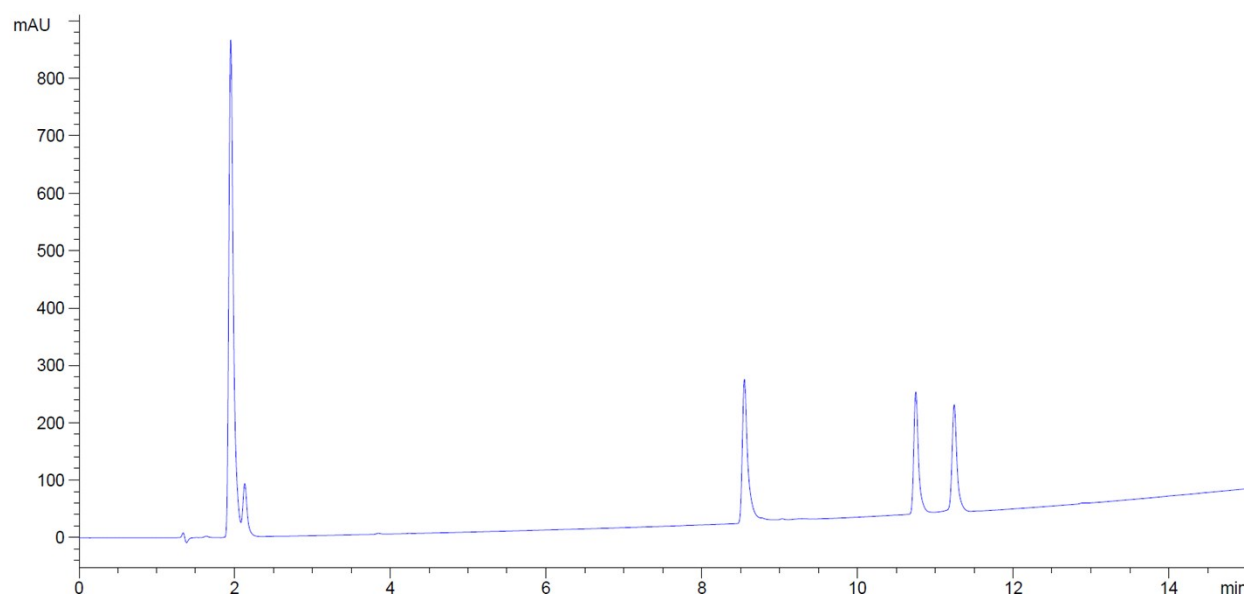

**HPLC-S3.** Fmoc-Arg(Pbf)-OH : DIC : OxymaPure [1:1:1], at 60 °C, in DMF, in absence of nucleophile.

0 min

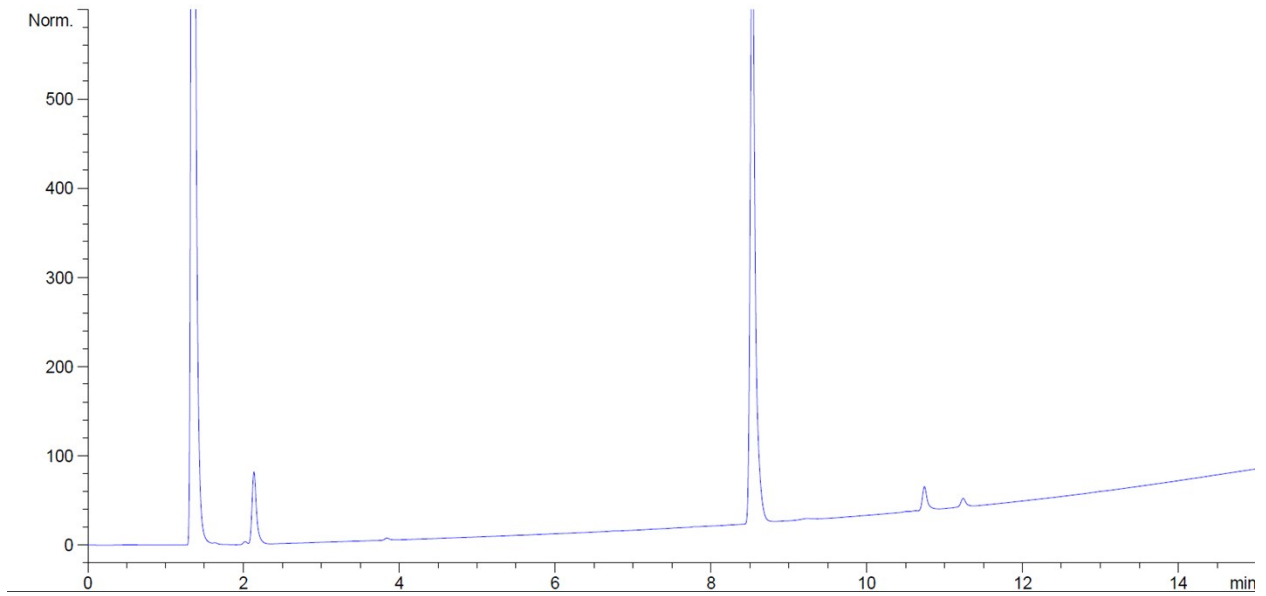

30 min

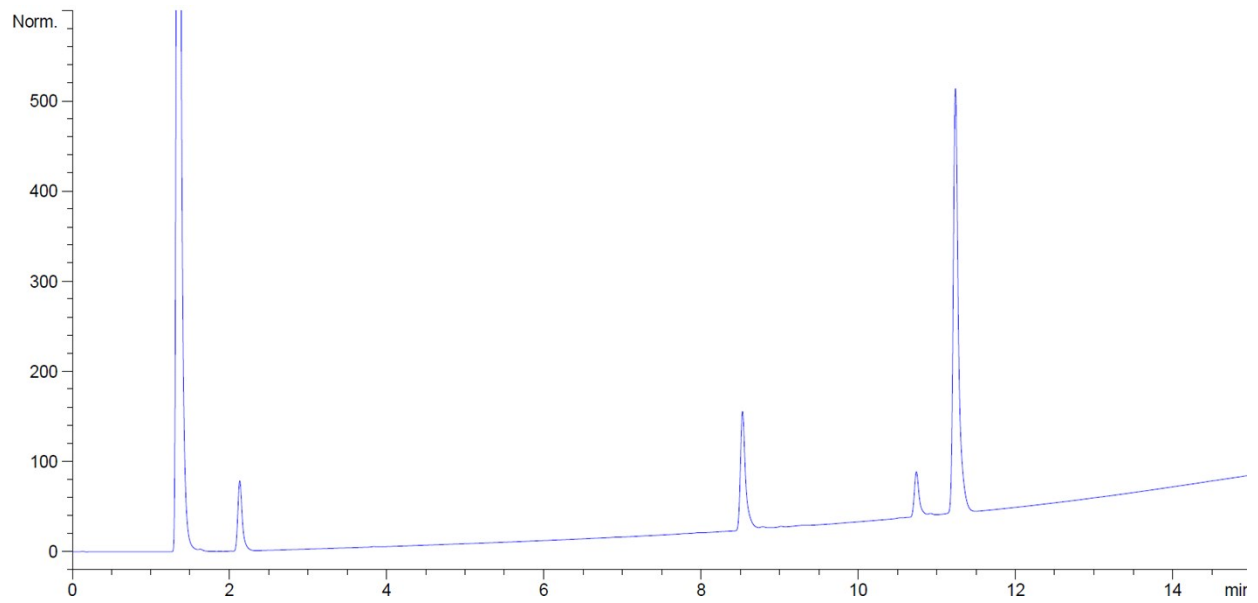

60 min

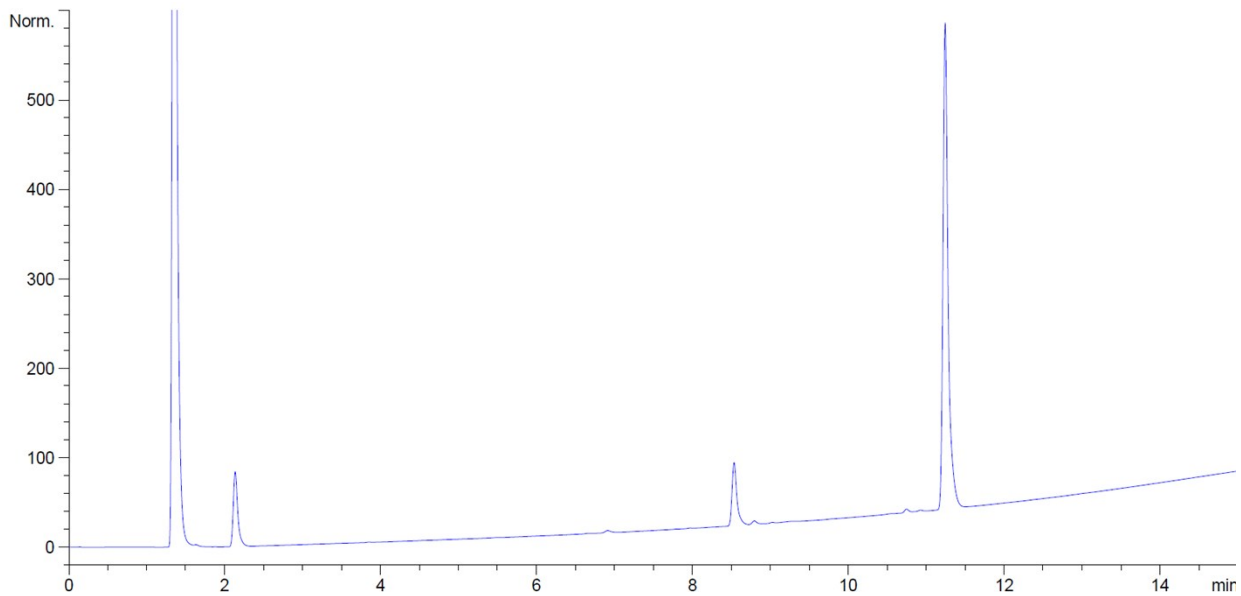

120 min

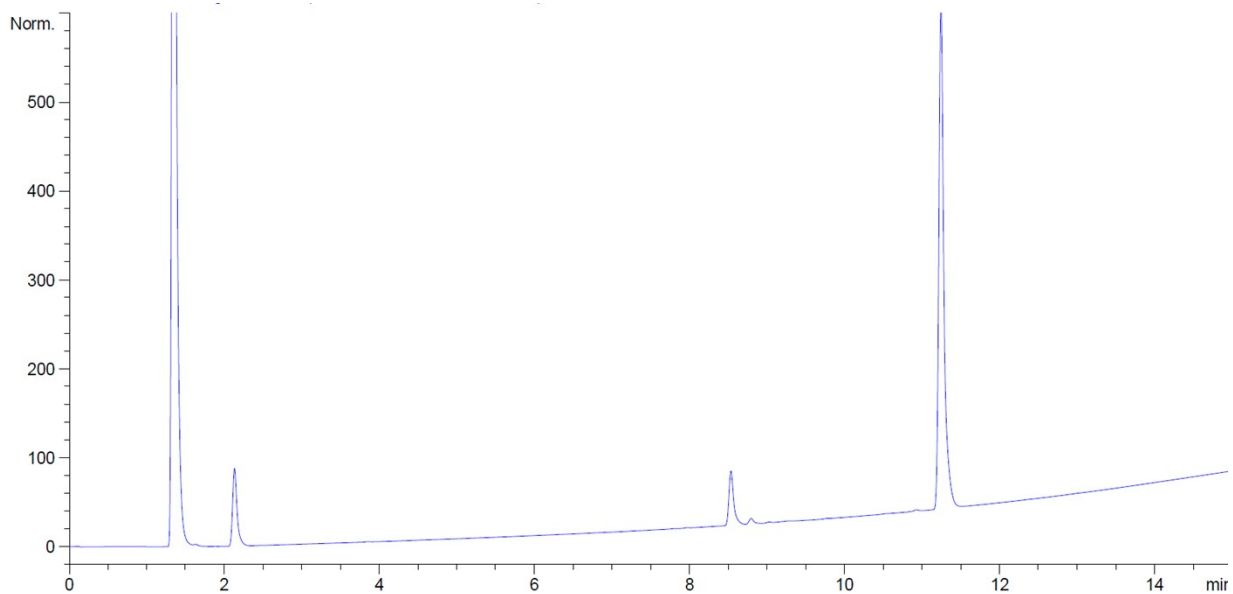

**HPLC-S4.** Fmoc-Arg(Pbf)-OH : DIC : OxymaPure [1:1:1], at 60 °C, in NBP, in absence of nucleophile.



0 min

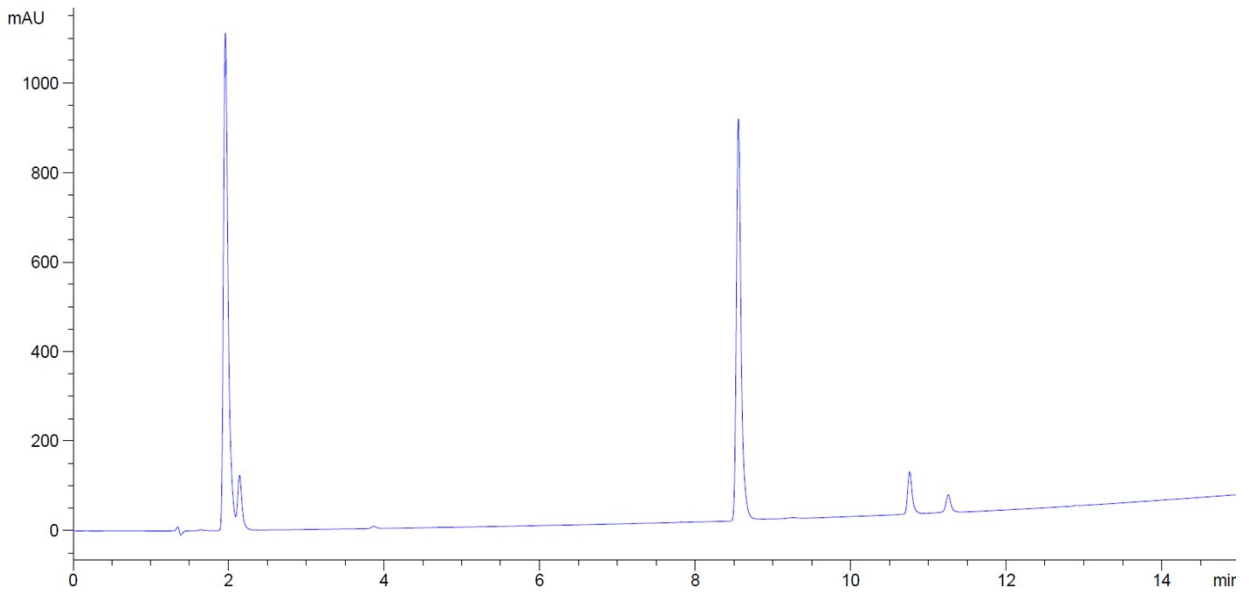

30 min

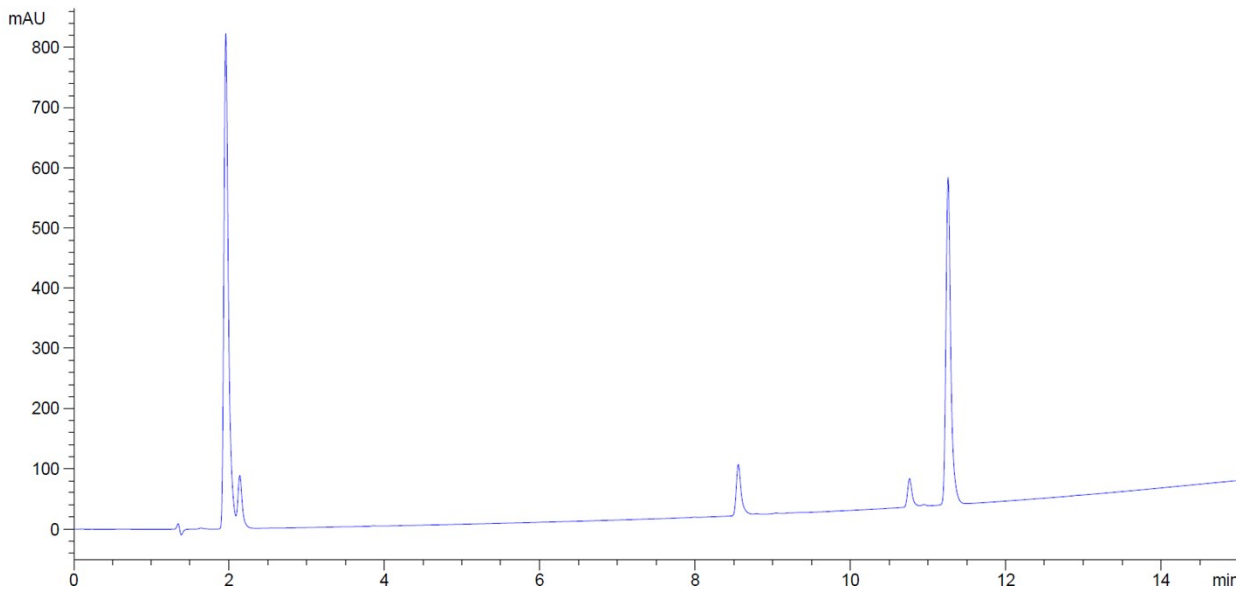

60 min

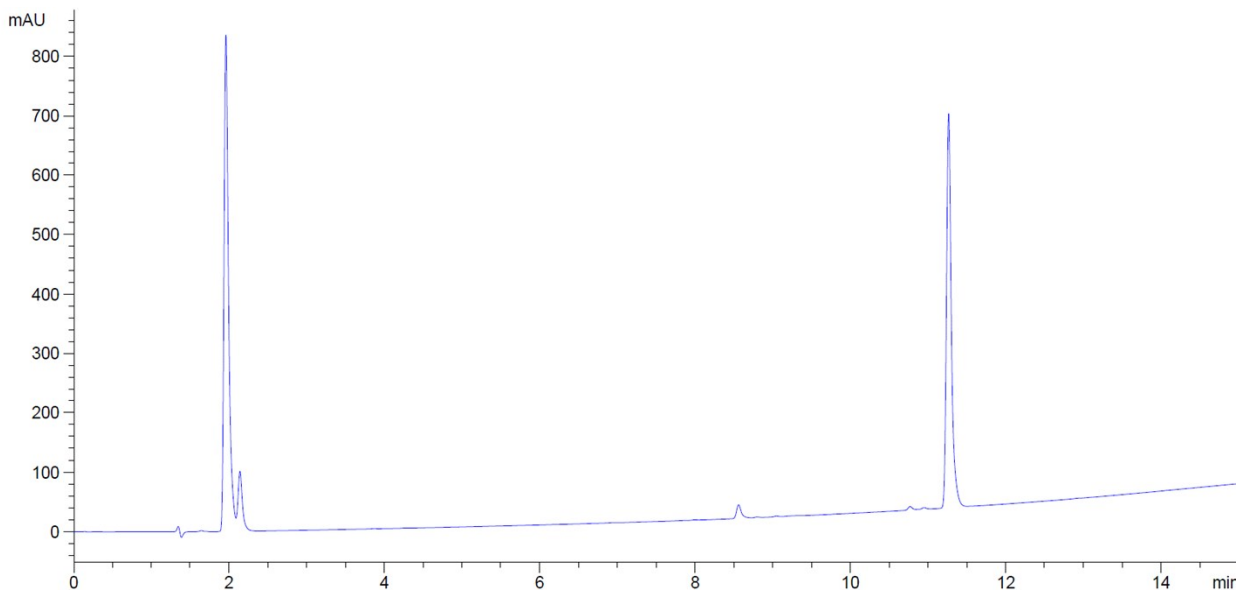

120 min

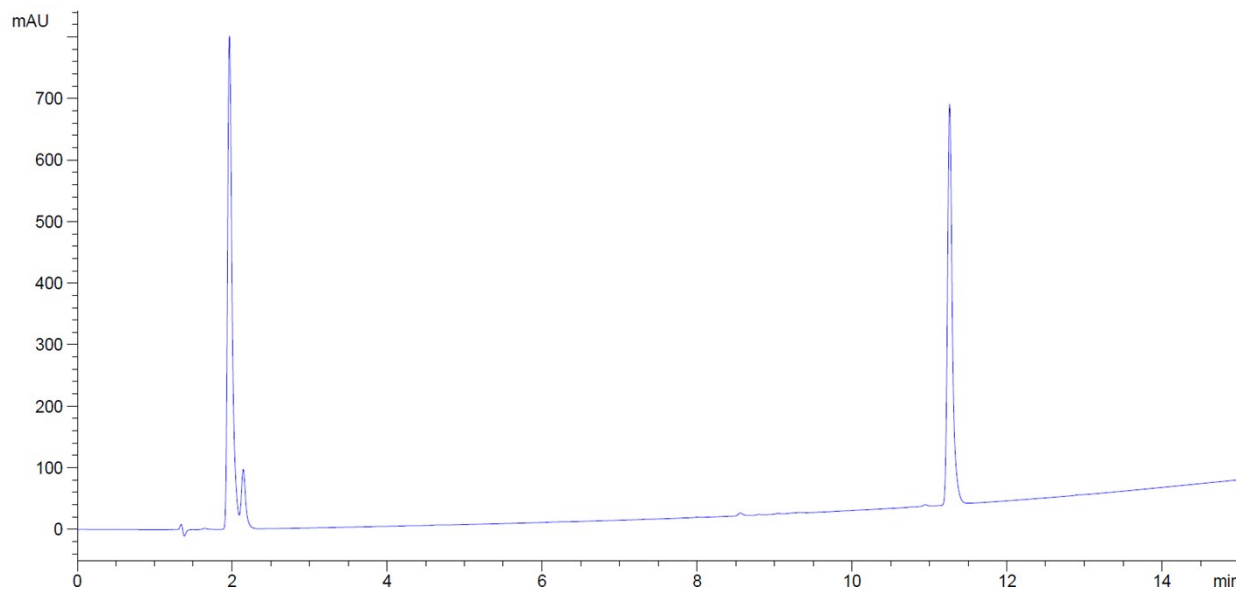

**HPLC-S5.** Fmoc-Arg(Pbf)-OH : DIC : OxymaPure [1:1:1], at RT, in DMF, in presence of nucleophile (tripeptidyl resin), 0.075M.

0 min

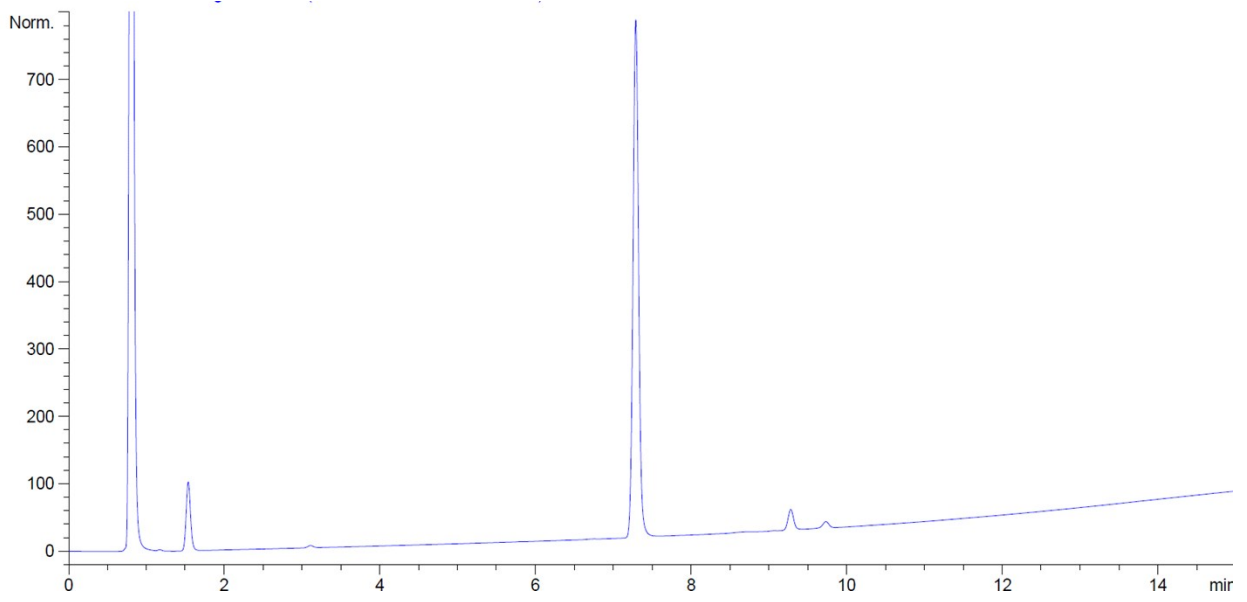

30 min

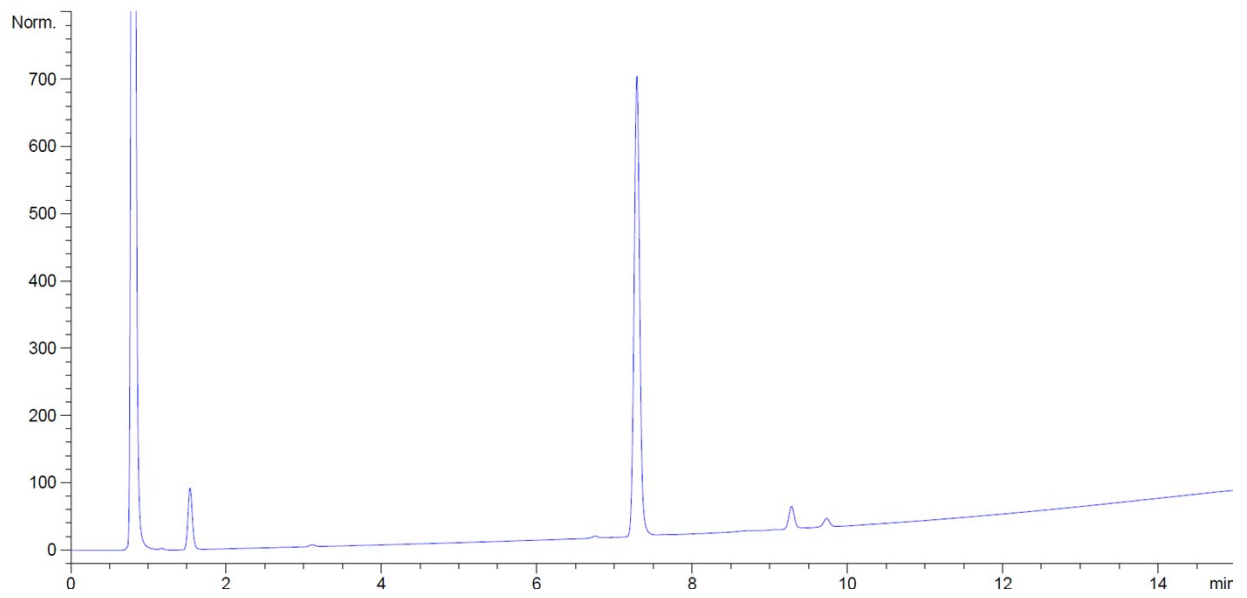

60 min

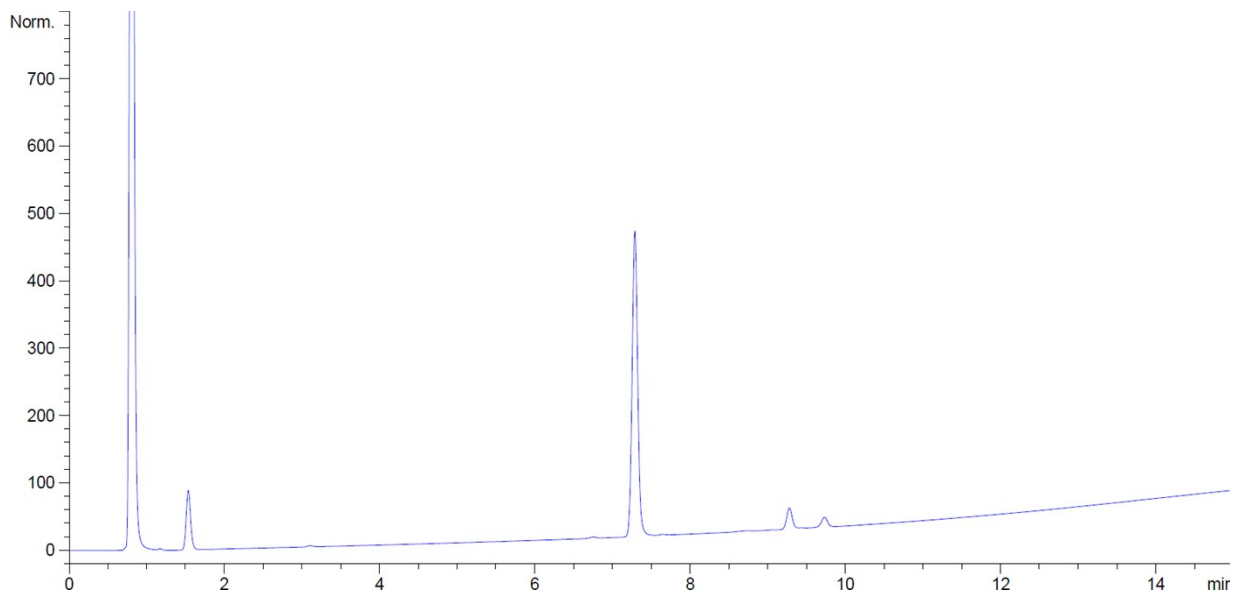

120 min

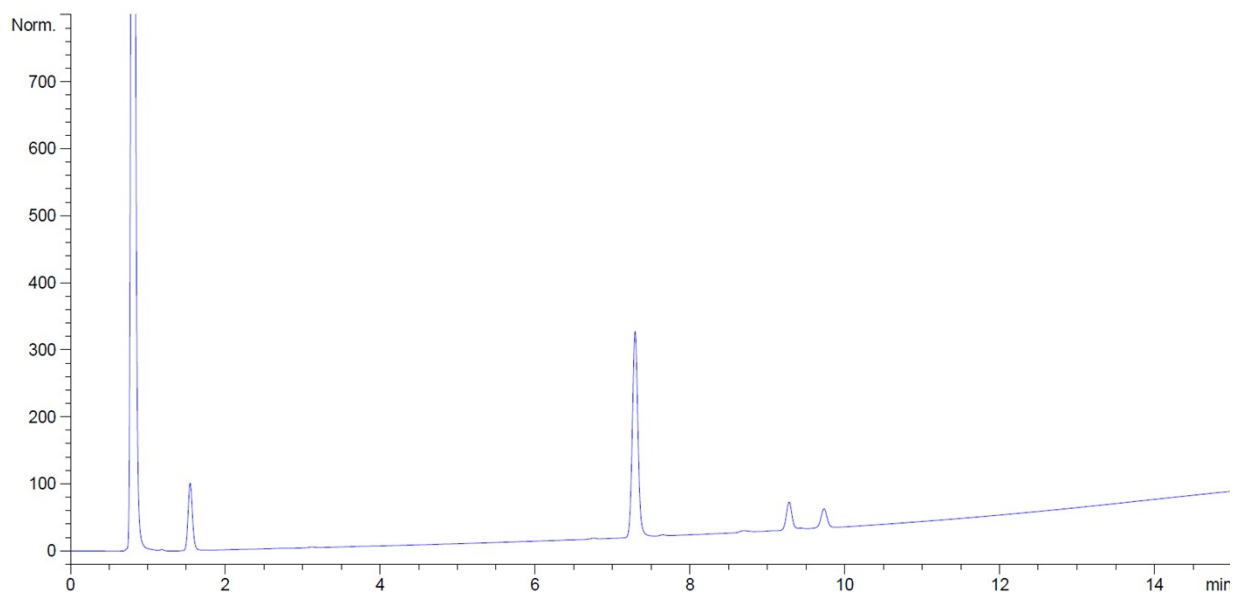

**HPLC-S6.** Fmoc-Arg(Pbf)-OH : DIC : OxymaPure [1:1:1], at RT, in NBP, in presence of nucleophile (tripeptidyl resin), 0.075M.

0 min

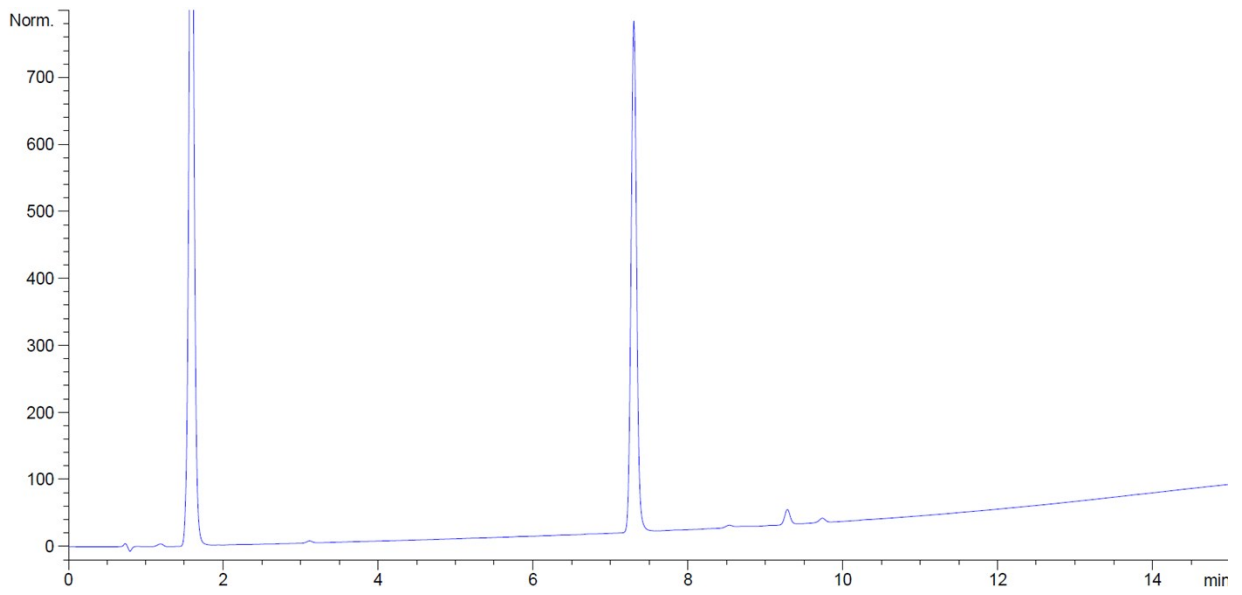

30 min

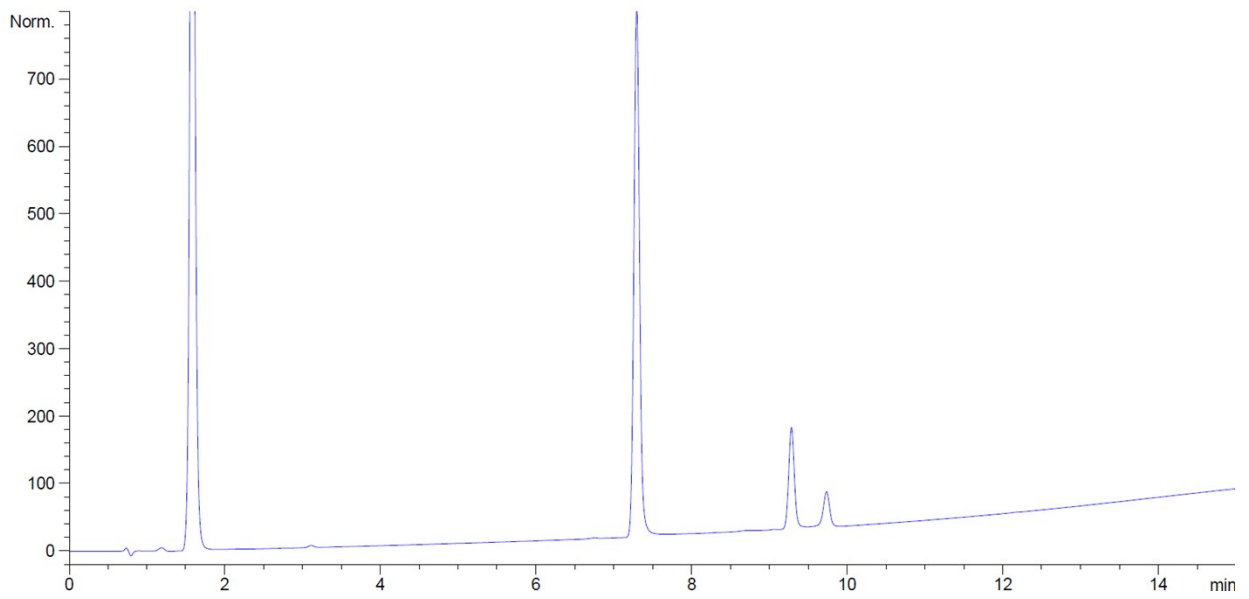

60 min

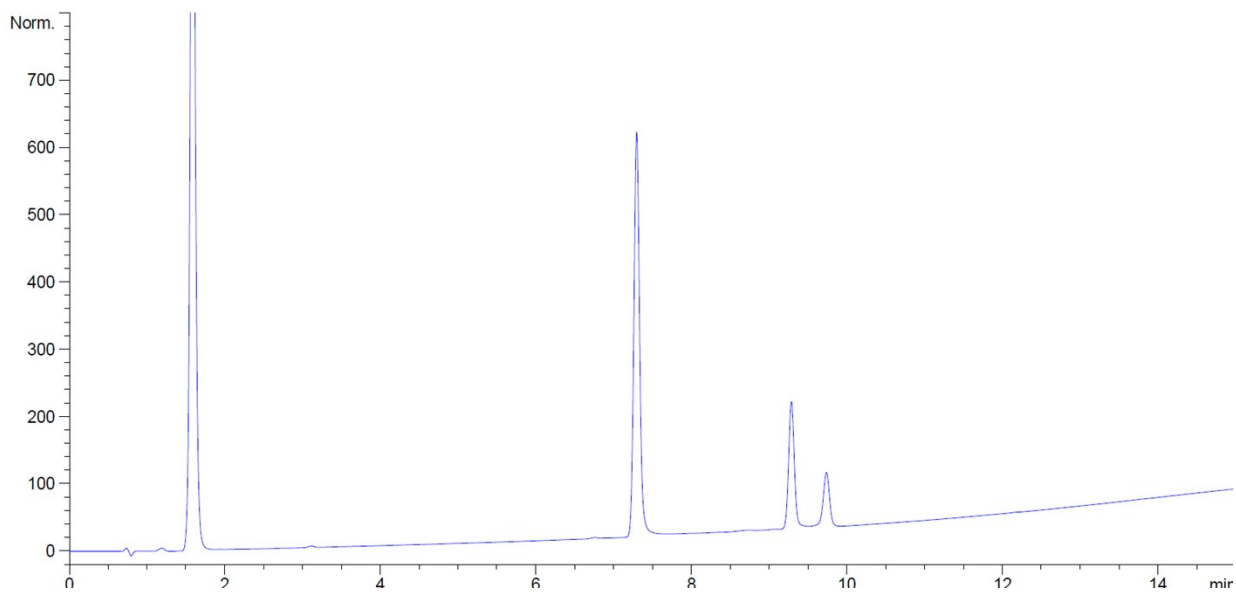

120 min

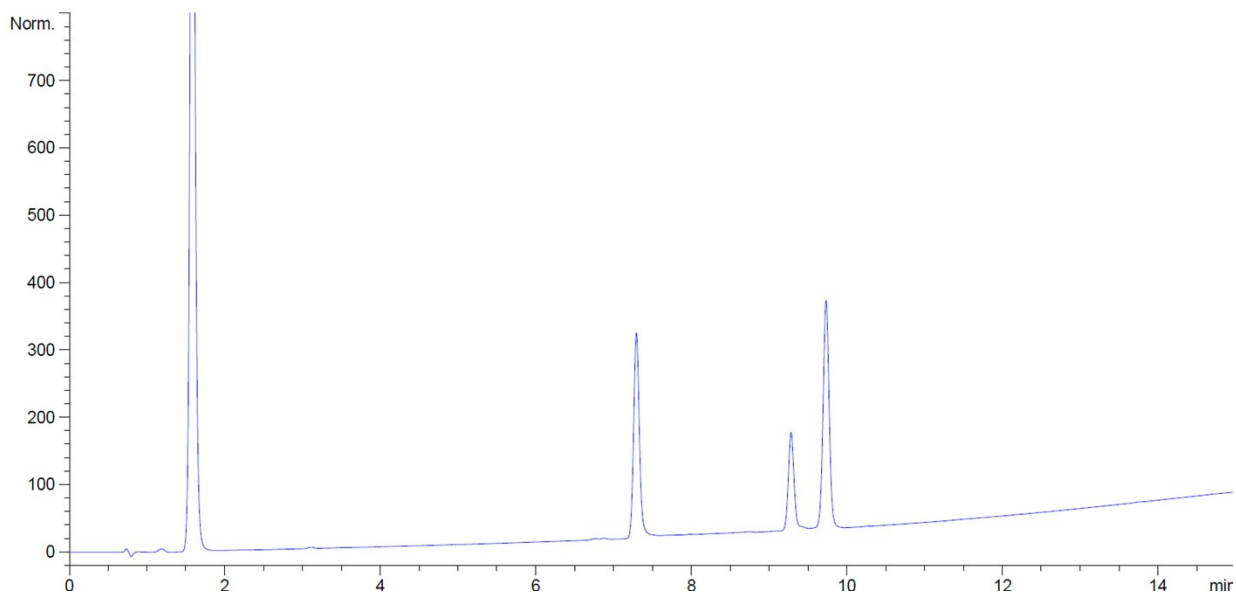

**HPLC-S7.** Fmoc-Arg(Pbf)-OH : DIC : OxymaPure [1:1:1], at 45 °C, in DMF, in presence of nucleophile (tripeptidyl resin), 0.075M

0 min

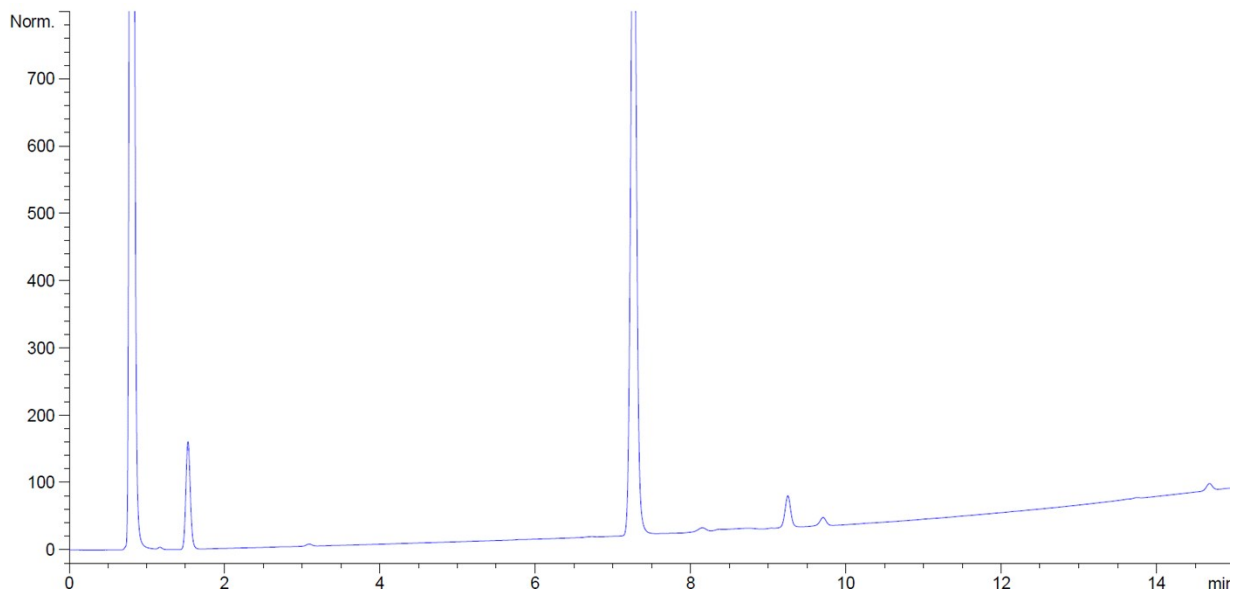

30 min

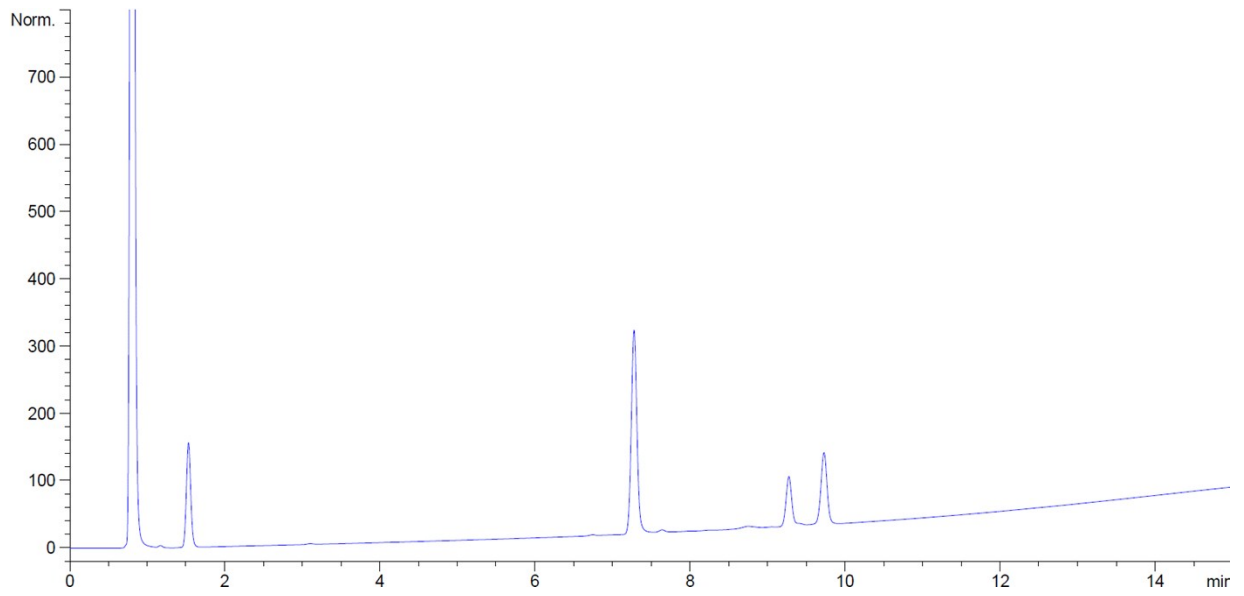

60 min

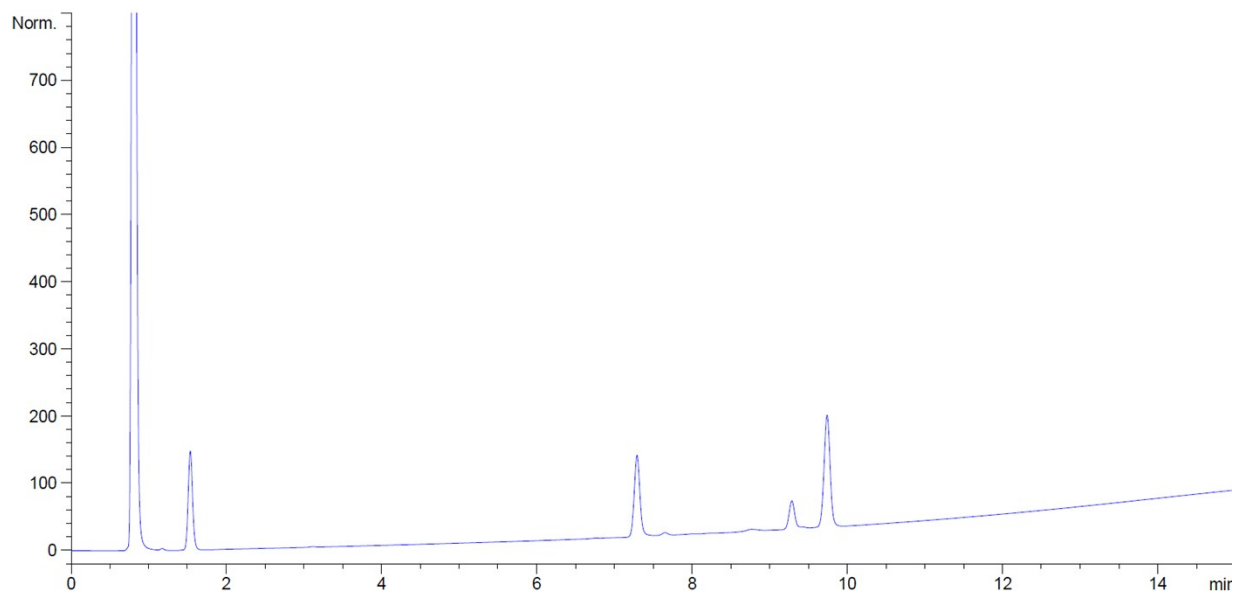

120 min

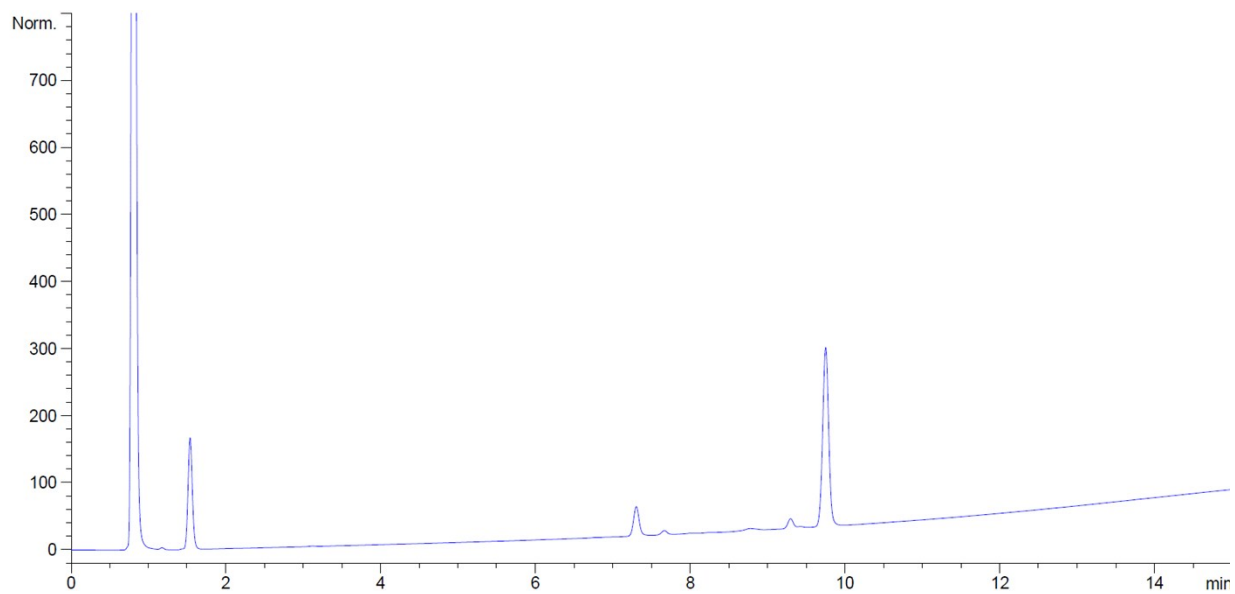

**HPLC-S8.** Fmoc-Arg(Pbf)-OH : DIC : OxymaPure [1:1:1], at 45 °C, in NBP, in presence of nucleophile (tripeptidyl resin), 0.075M.



0 min

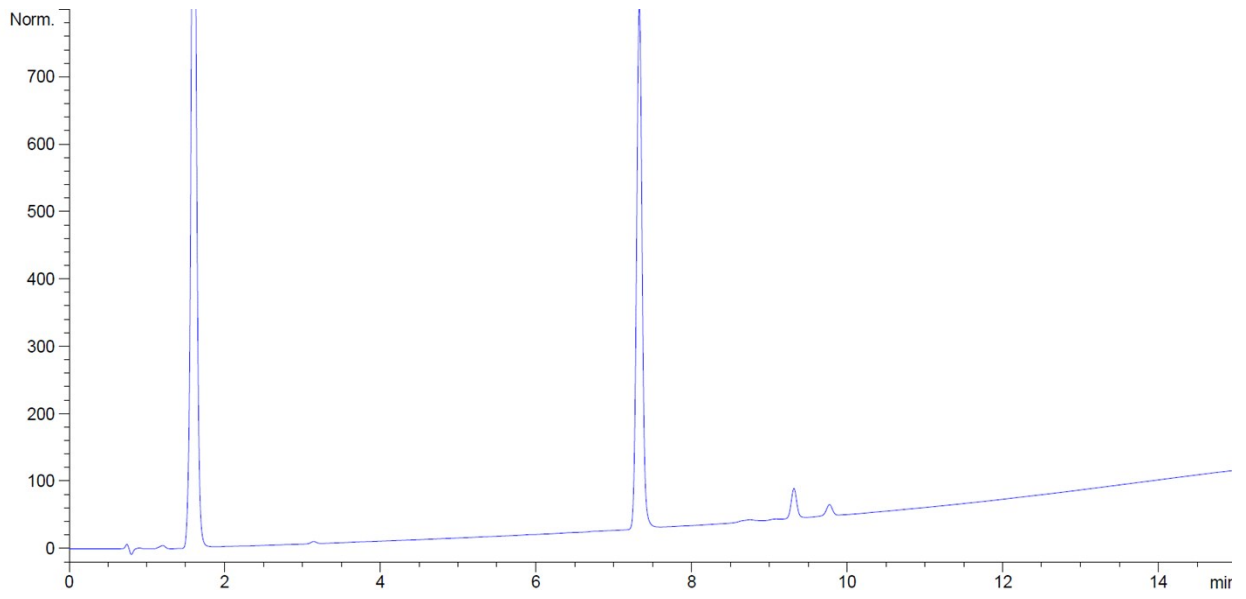

30 min

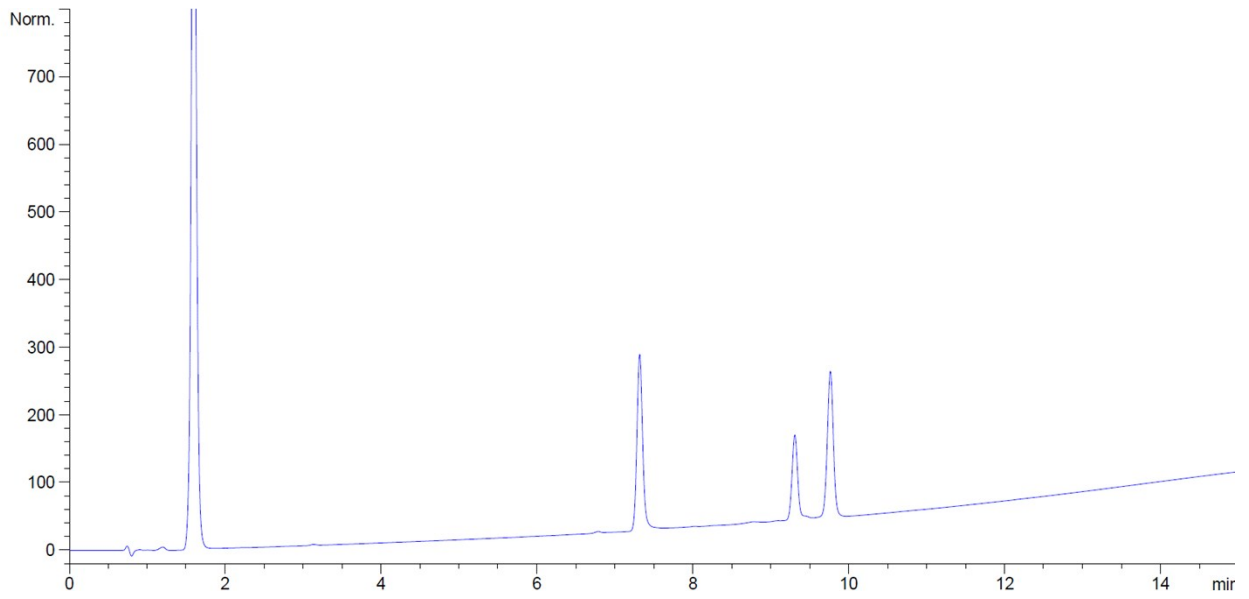

60 min

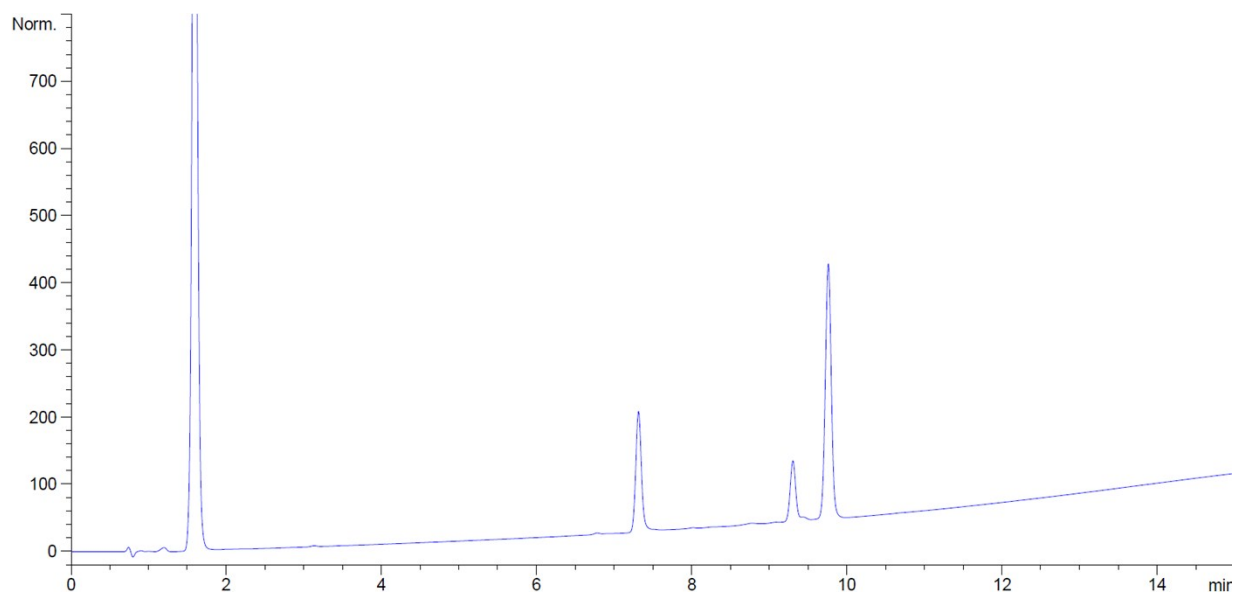

120 min

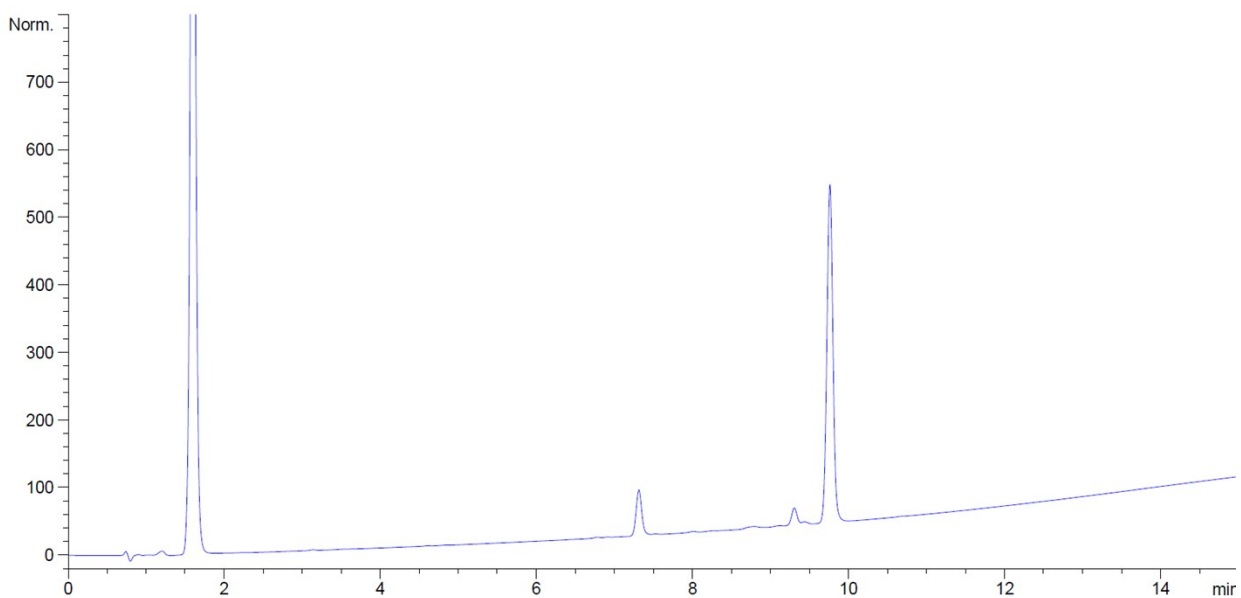

**HPLC-S9.** Fmoc-Arg(Pbf)-OH : DIC : OxymaPure [1:1:1], at 60 °C, in NBP, in presence of nucleophile (tripeptidyl resin), 0.075M.

0 min

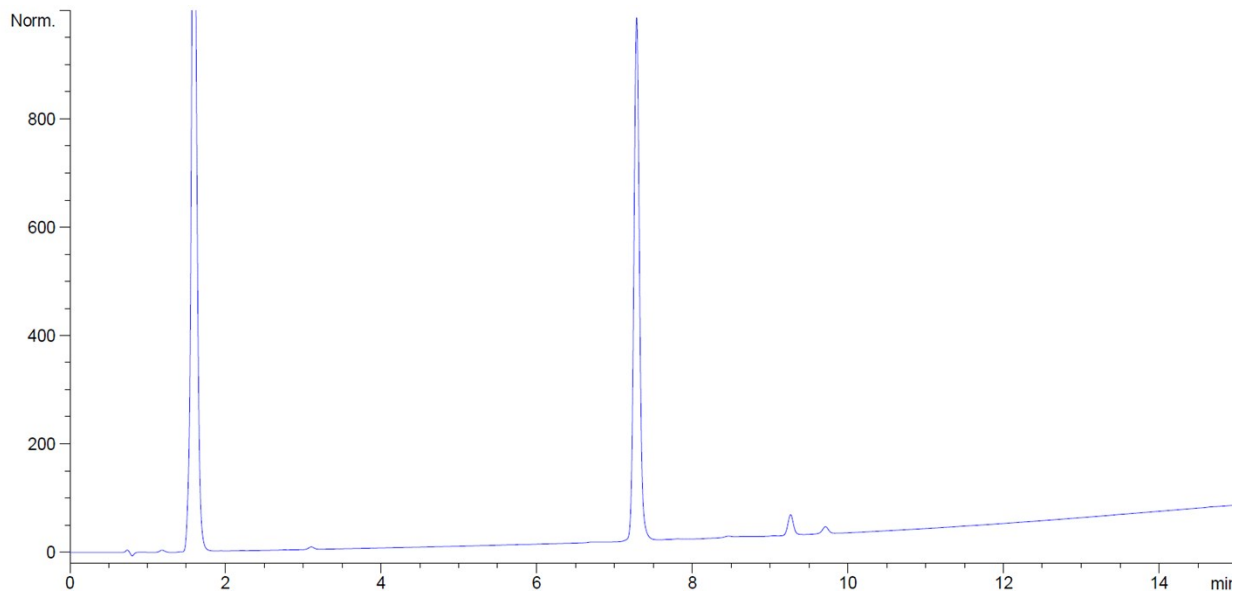

30 min

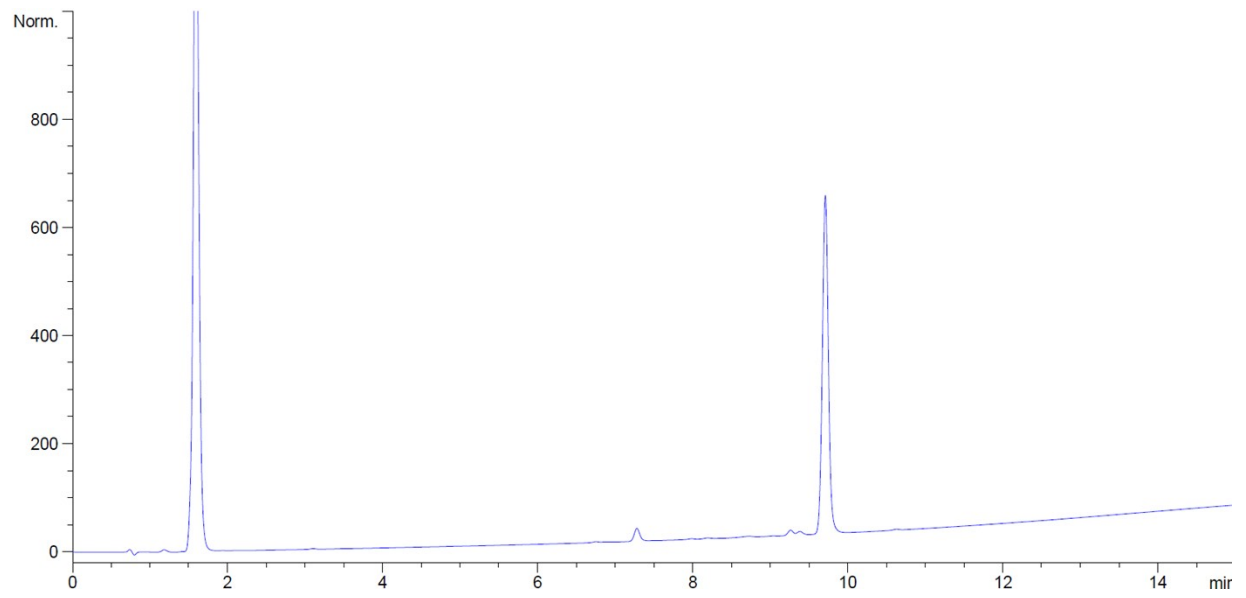

60 min

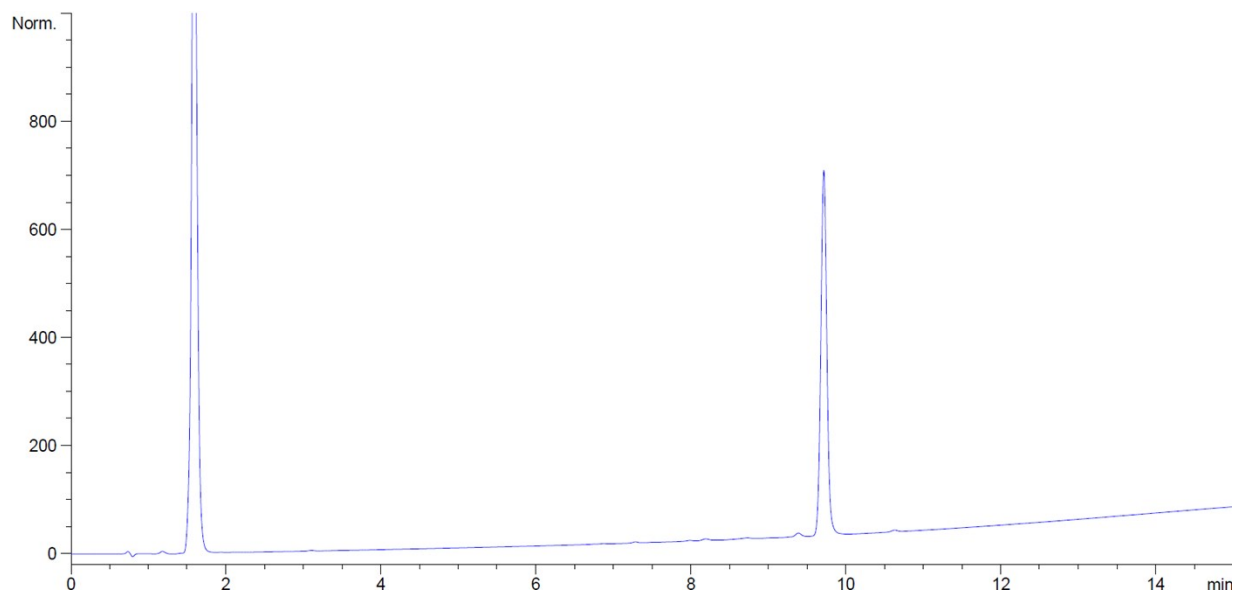

120 min

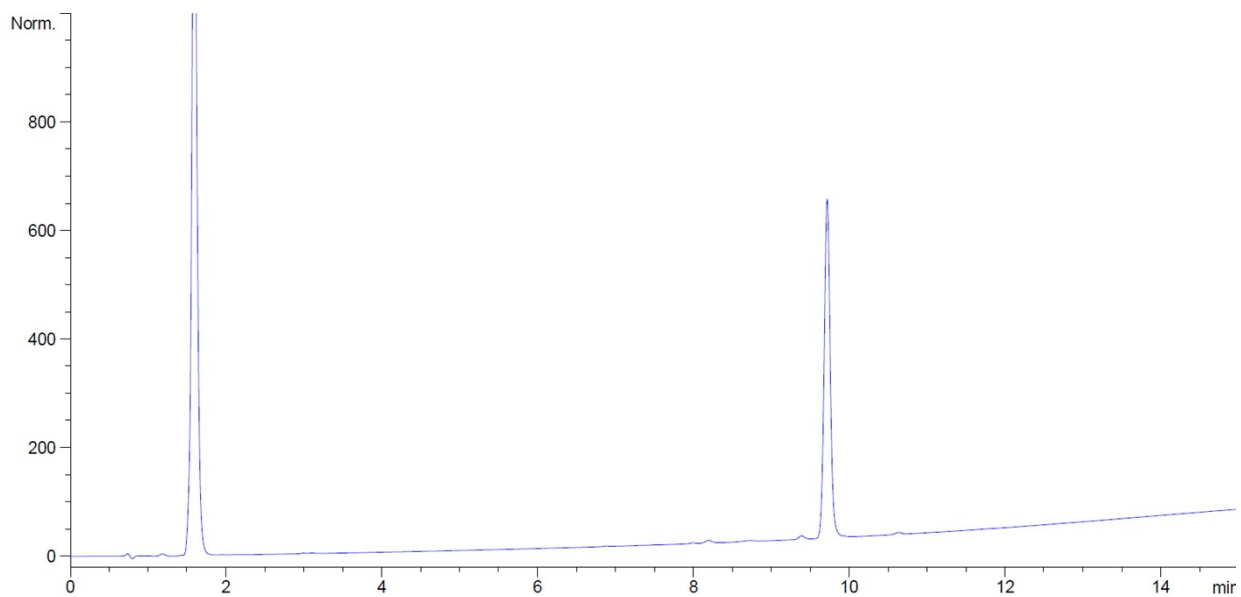

**HPLC-S10.** Fmoc-Arg(Pbf)-OH : DIC : OxymaPure [1:1:1], at 45 °C, in NBP, in presence of nucleophile (tripeptidyl resin), Pre-conditioned of tripeptidyl resin, 0.075M.

0 min

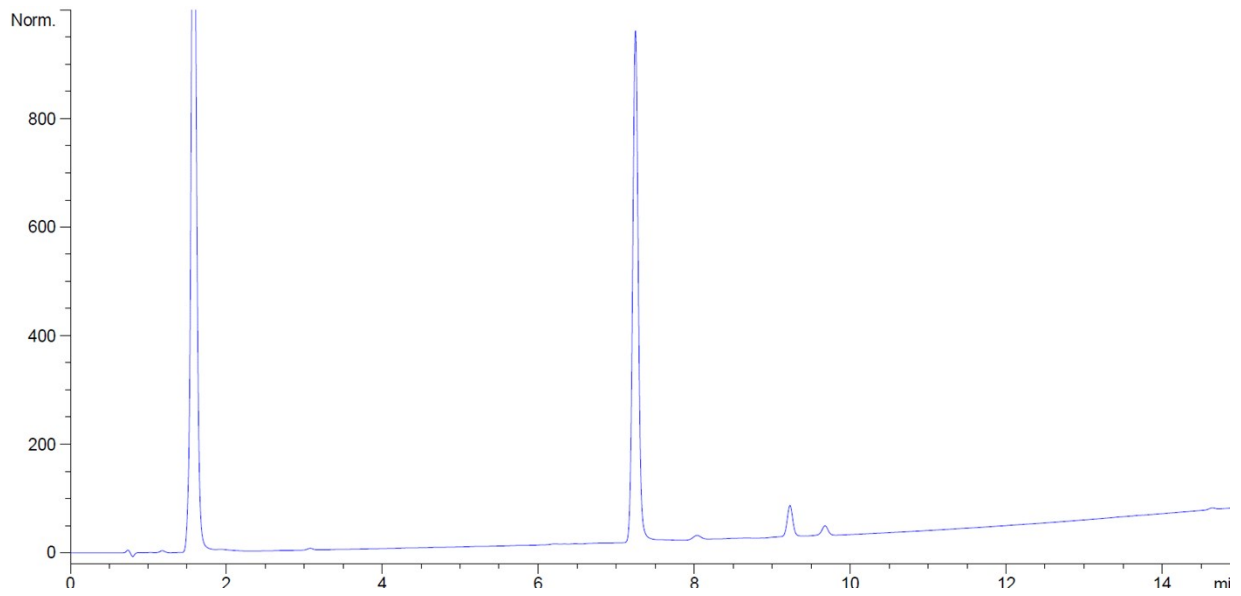

30 min

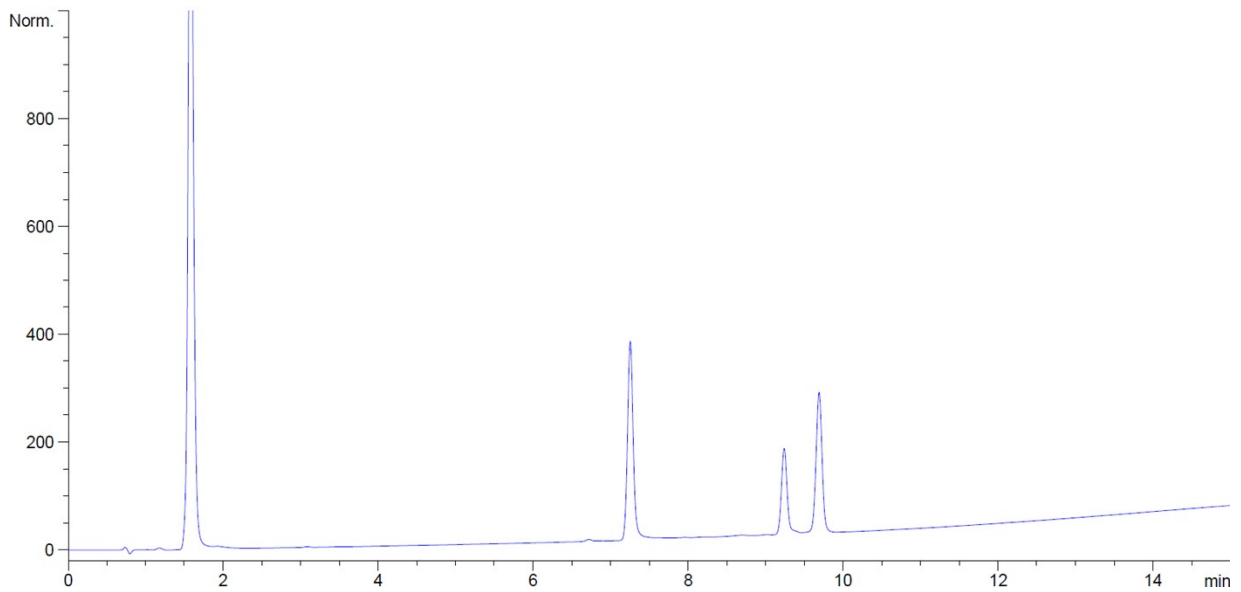

60 min

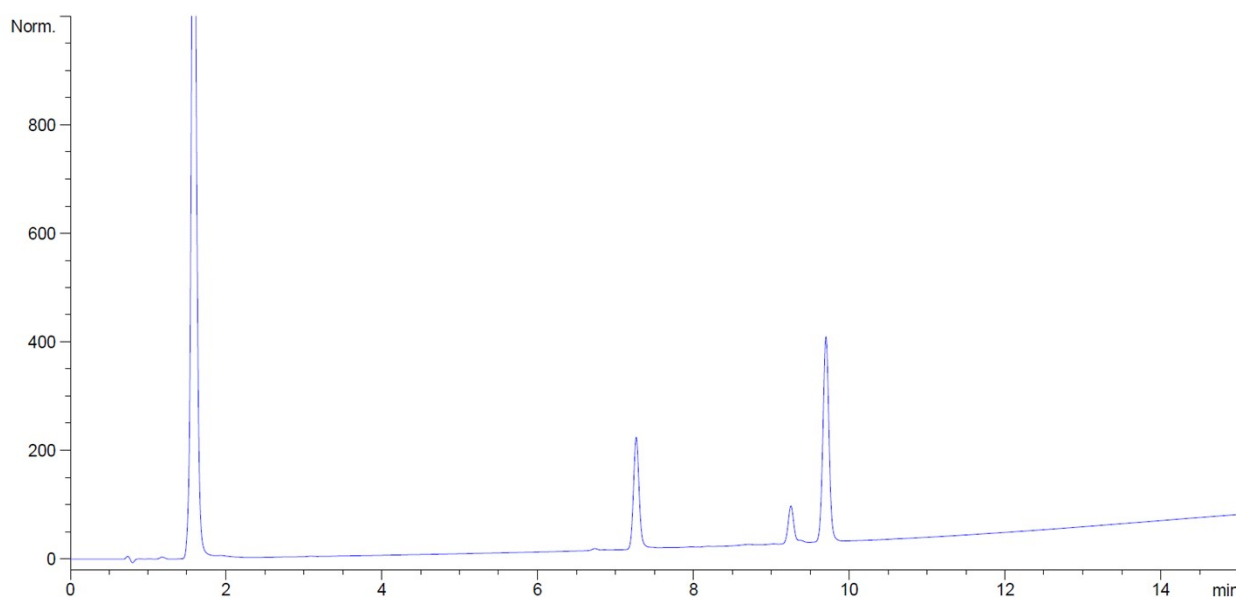

120 min

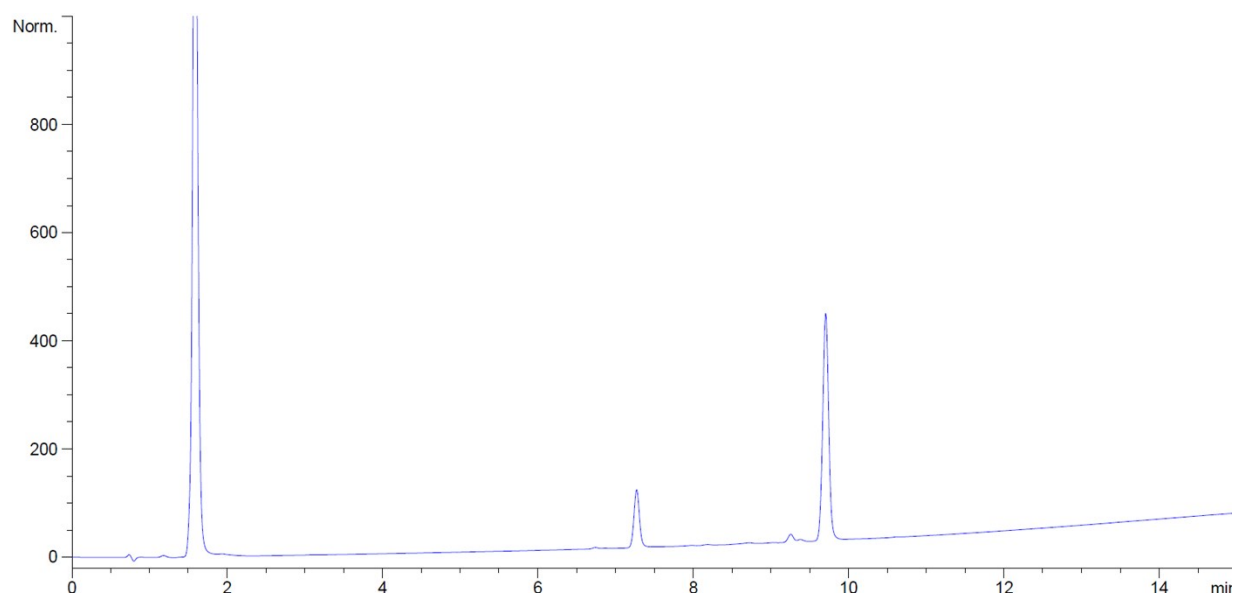

**HPLC-S11.** Fmoc-Arg(Pbf)-OH : DIC : OxymaPure [1:1:1], at 45 °C, in NBP, in presence of nucleophile (tripeptidyl resin), In-situ activation, 0.15M.

0 min

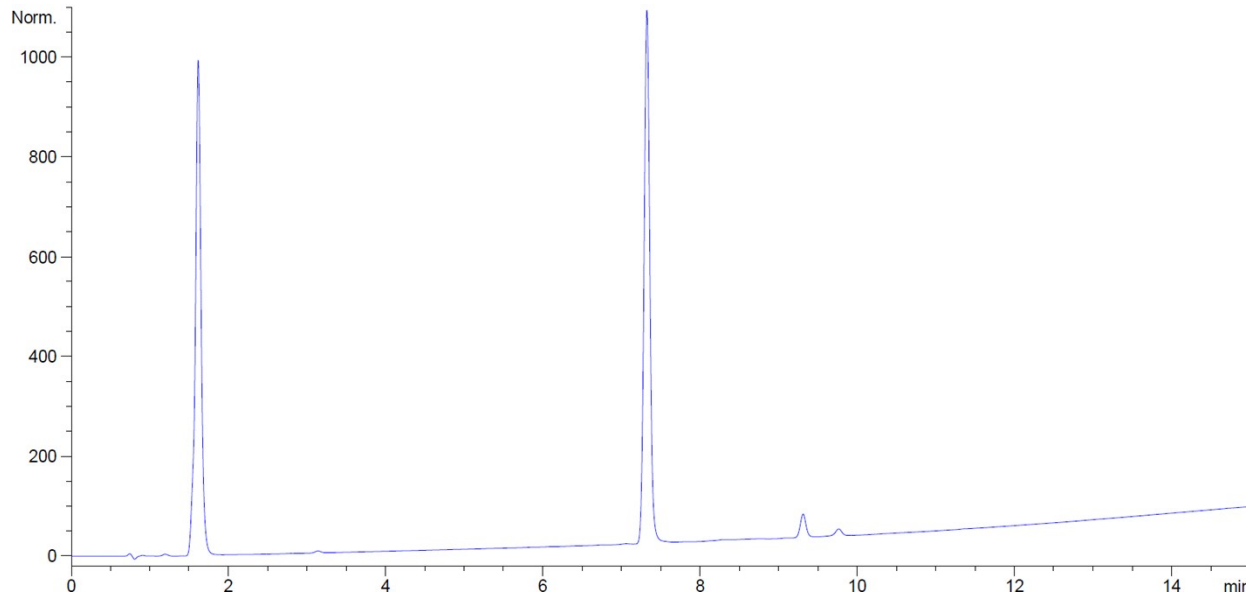

30 min

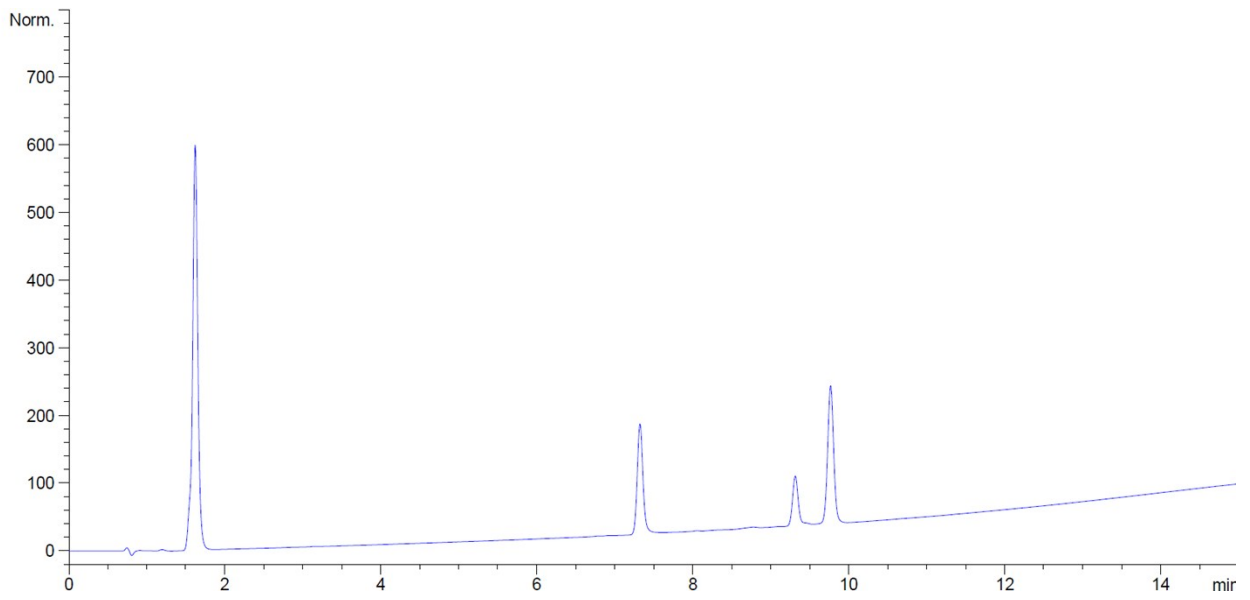

60 min

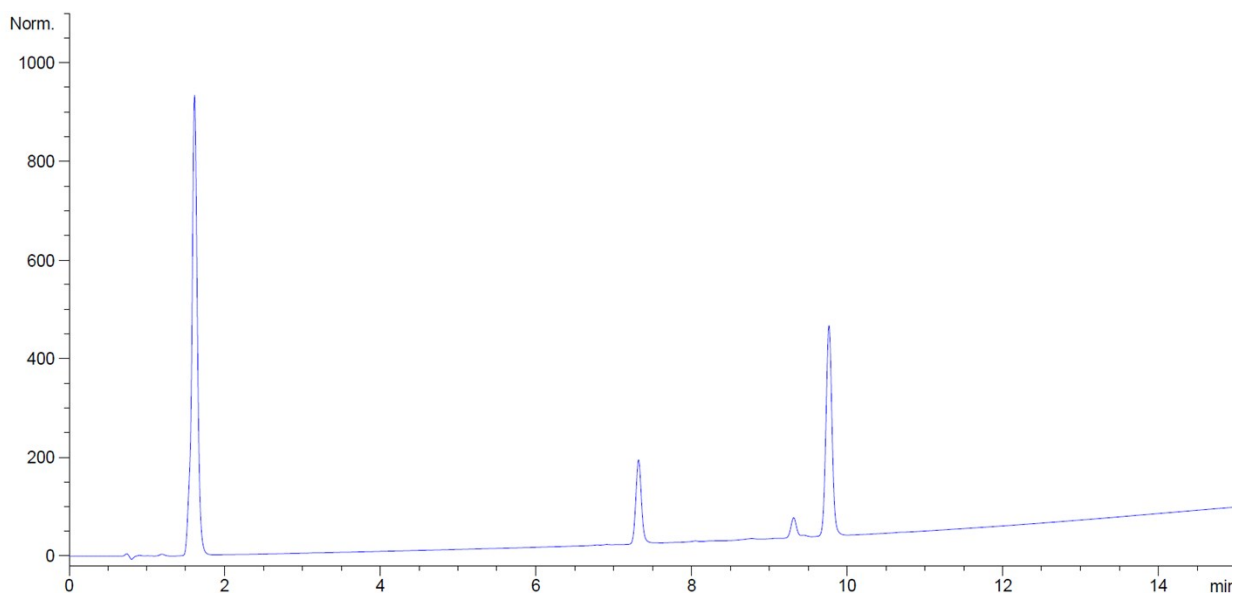

120 min

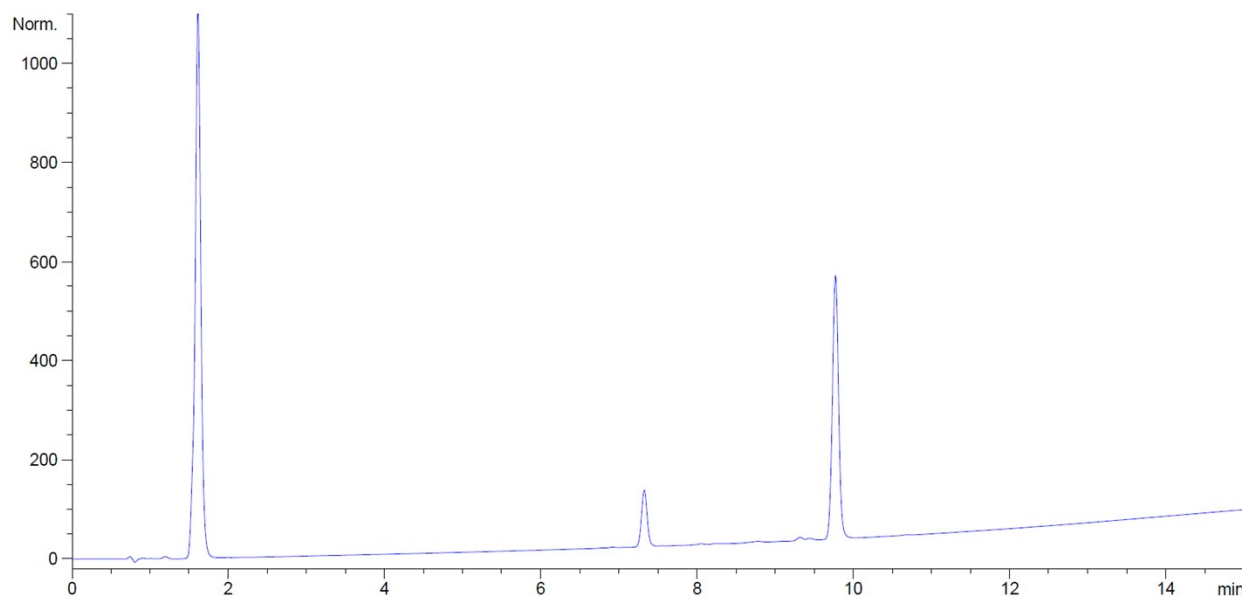

**HPLC-S12.** Fmoc-Arg(Pbf)-OH : DIC : OxymaPure [1:1:1], at 45 °C, in NBP, in presence of nucleophile (tripeptidyl resin), In-situ activation, 0.075M.



0 min

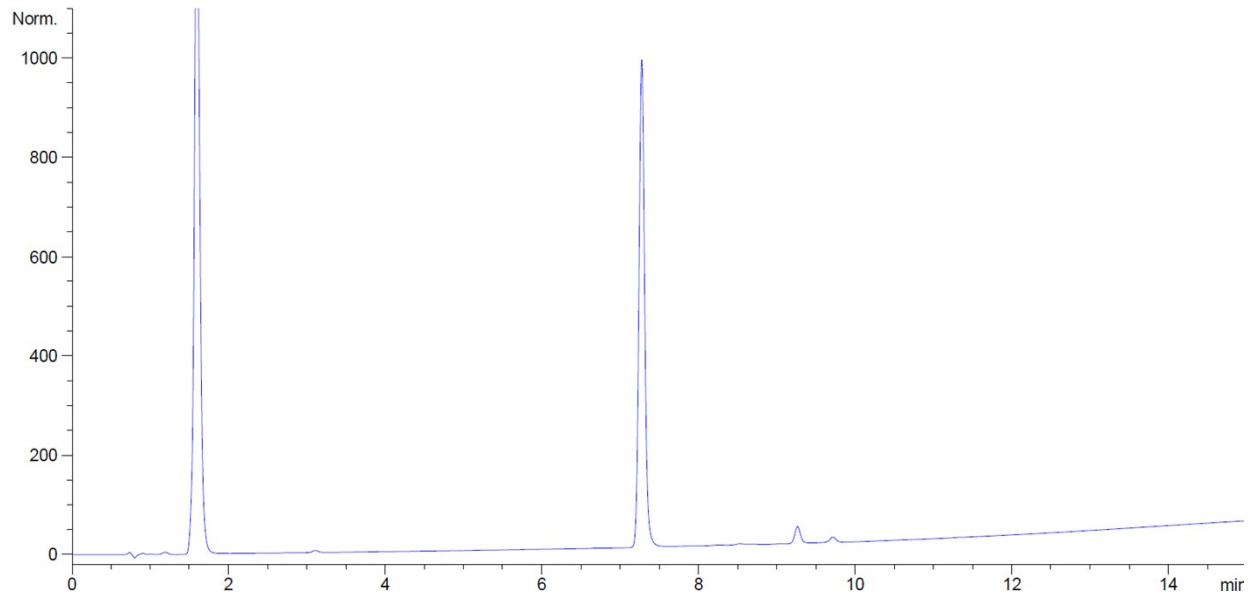

30 min

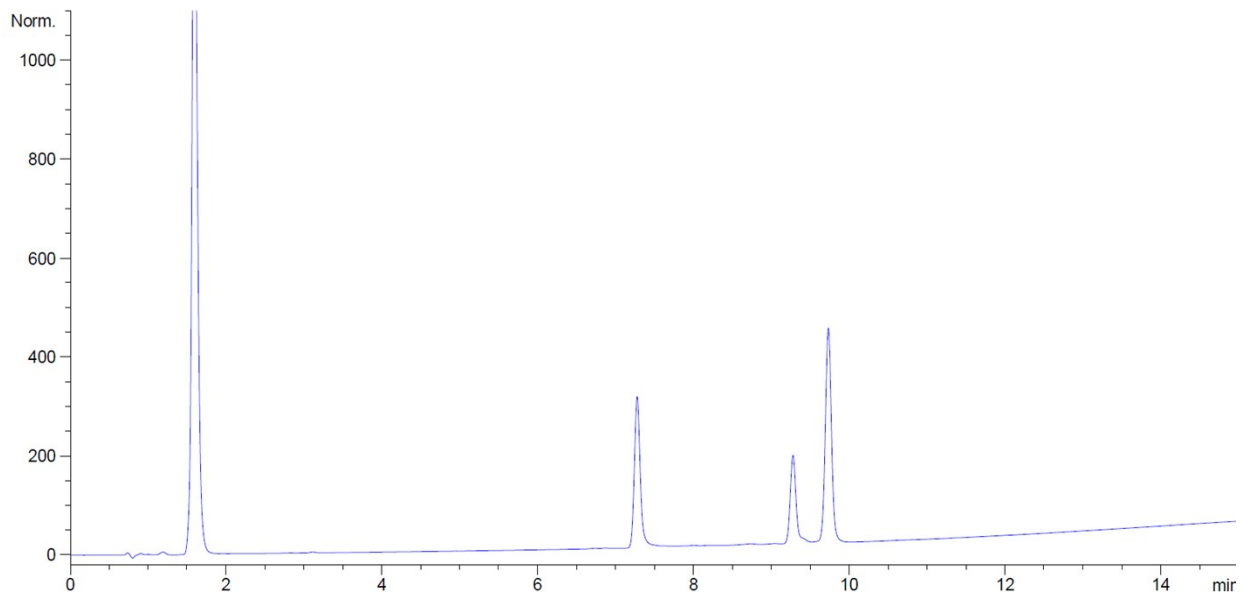

60 min

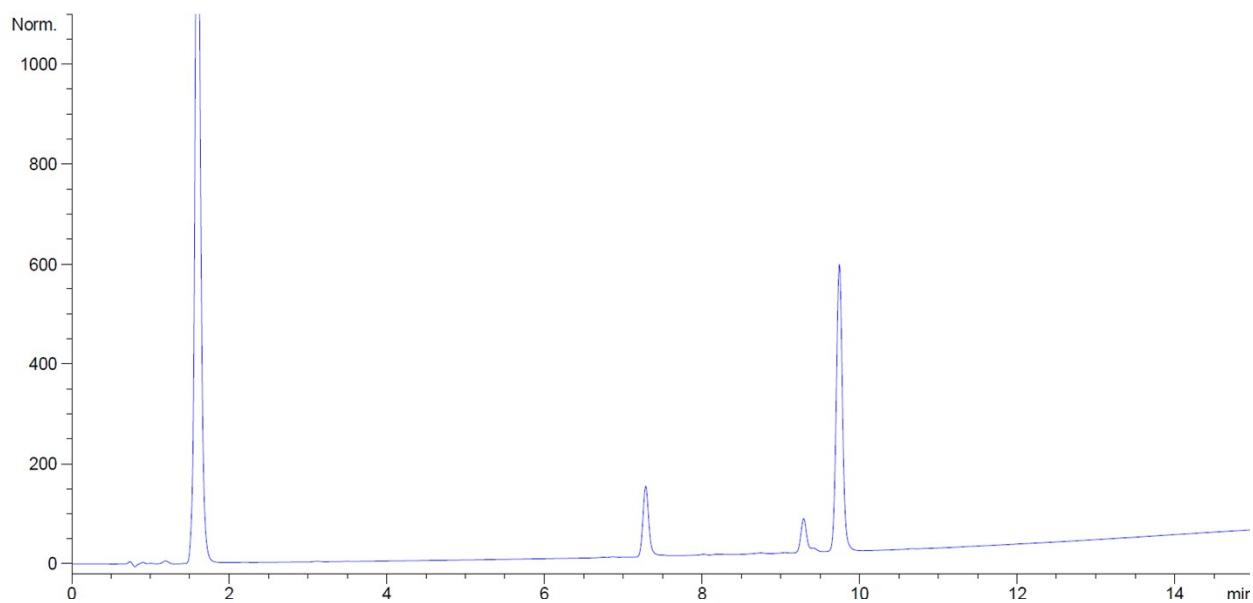

120 min

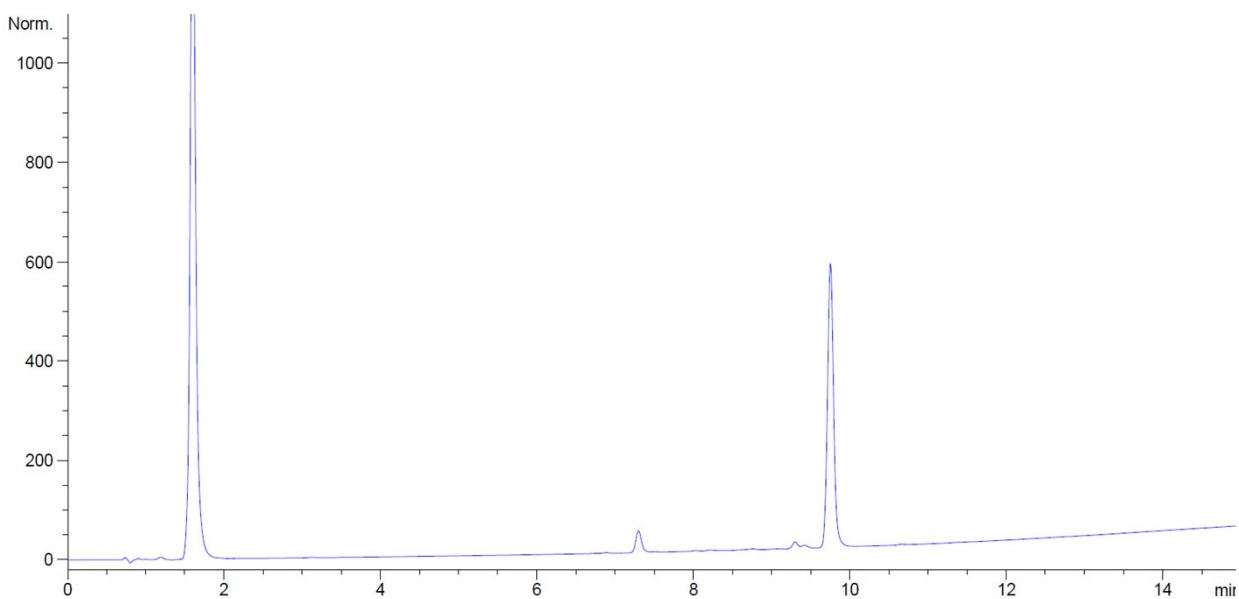

**HPLC-S13.** Fmoc-Arg(Pbf)-OH : DIC : OxymaPure [1:1.2:1], at 45 °C, in NBP, in presence of nucleophile (tripeptidyl resin), In-situ activation, 0.15M.

0 min

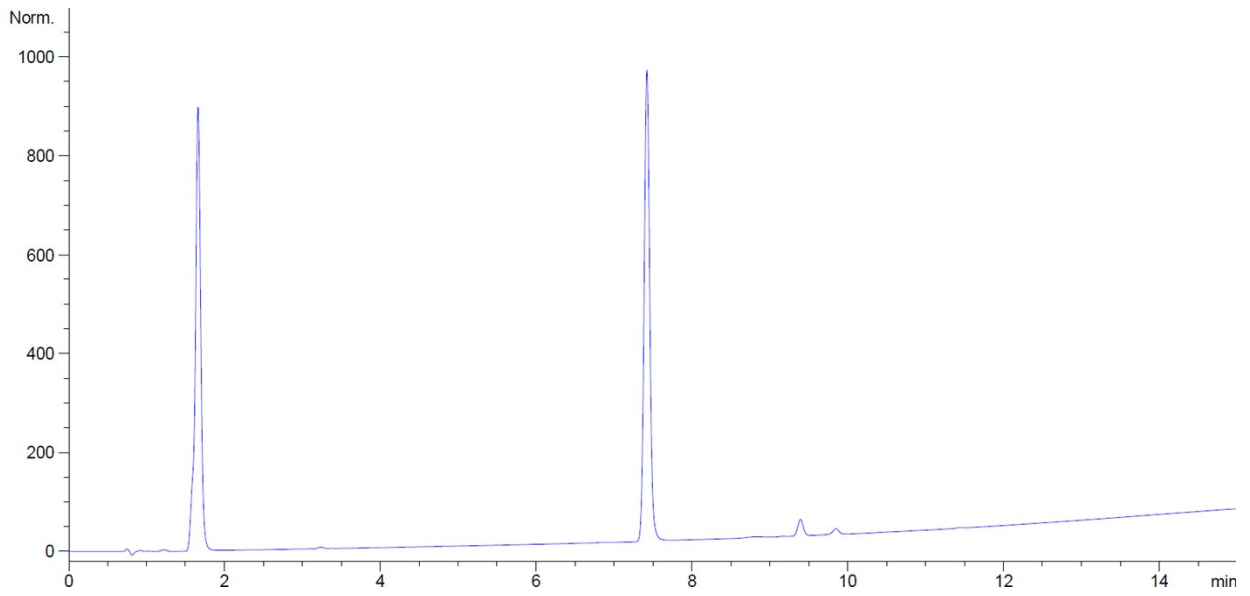

30 min

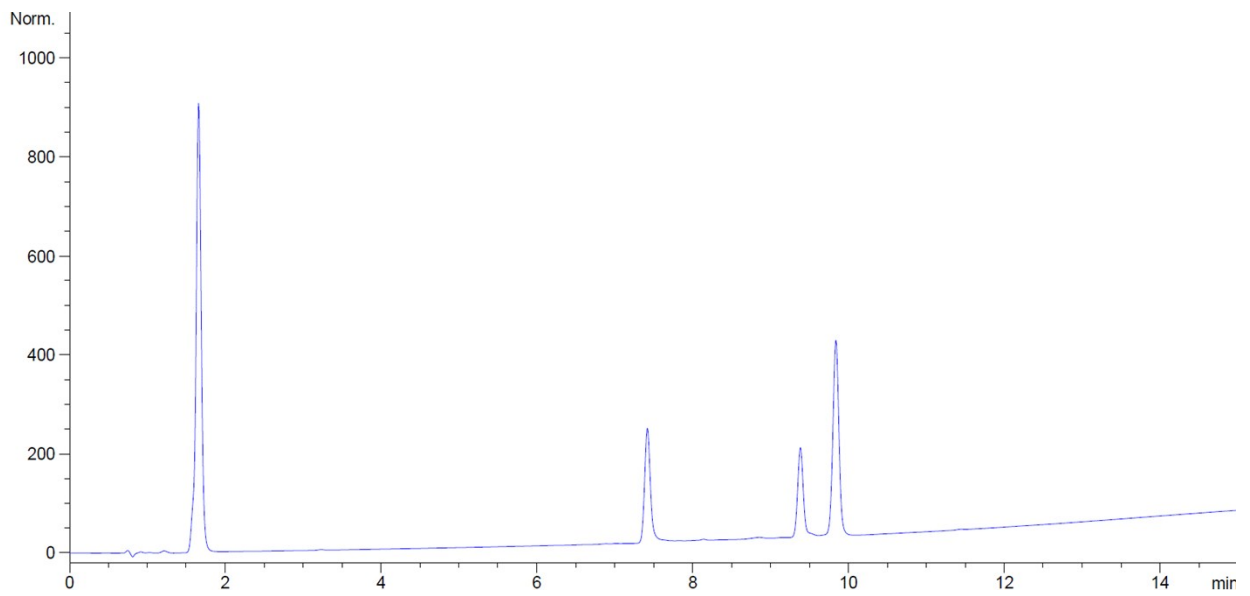

60 min

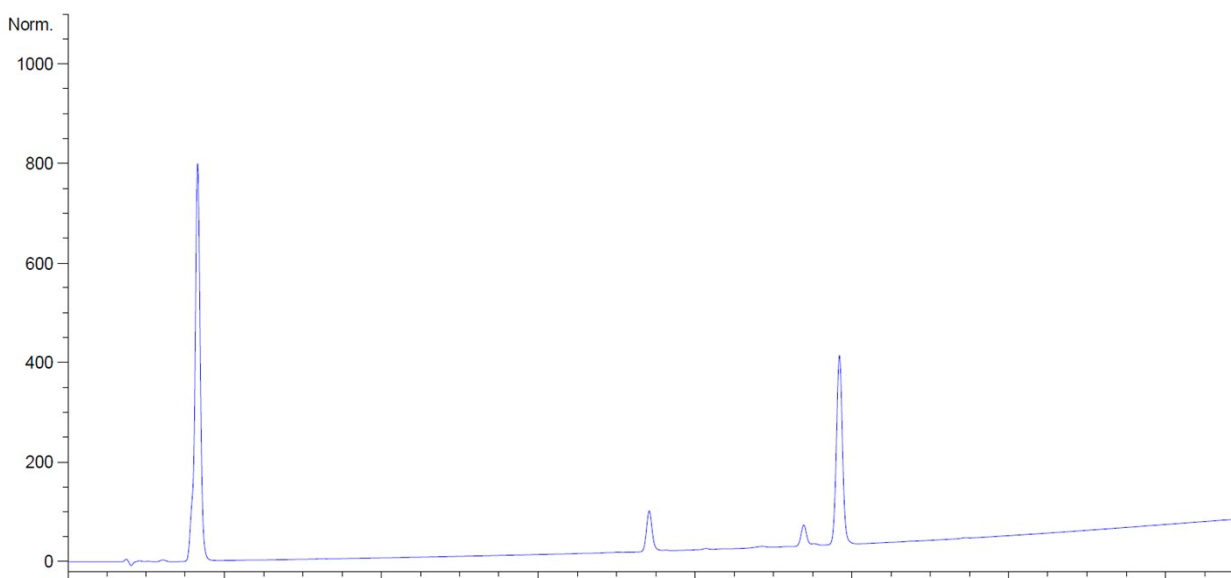

120 min

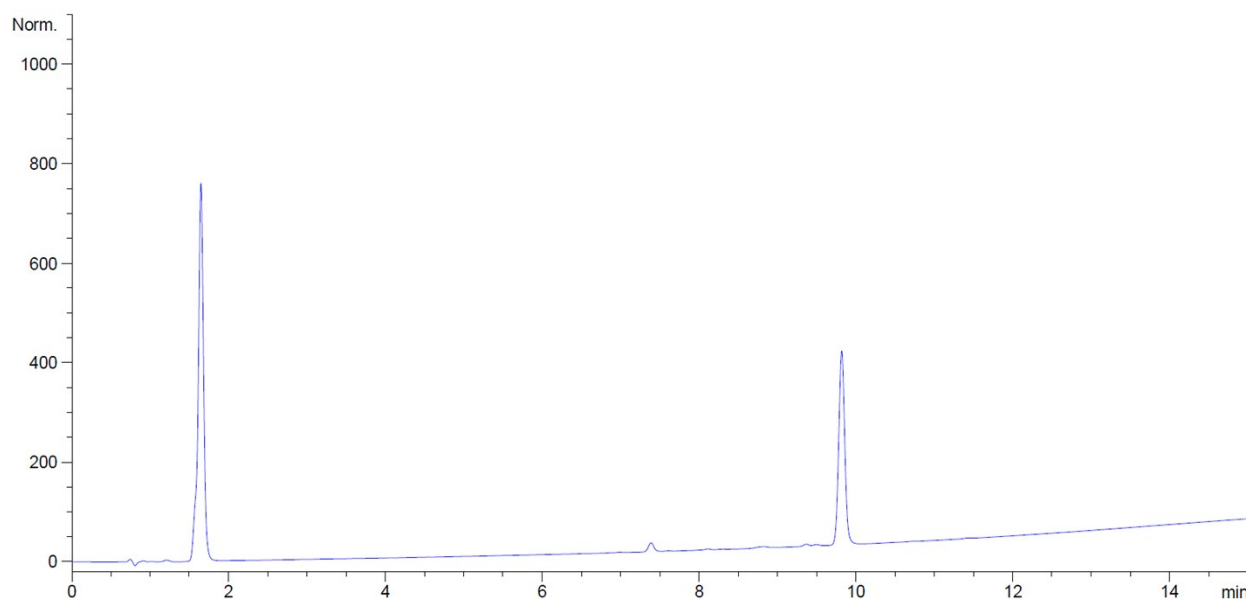

**HPLC-S14.** Fmoc-Arg(Pbf)-OH : DIC : OxymaPure [1:1.2:1], at 45 °C, in NBP, in presence of nucleophile (tripeptidyl resin), In-situ activation, half DIC at 0 min and half at 30 min, 0.15M.

0 min

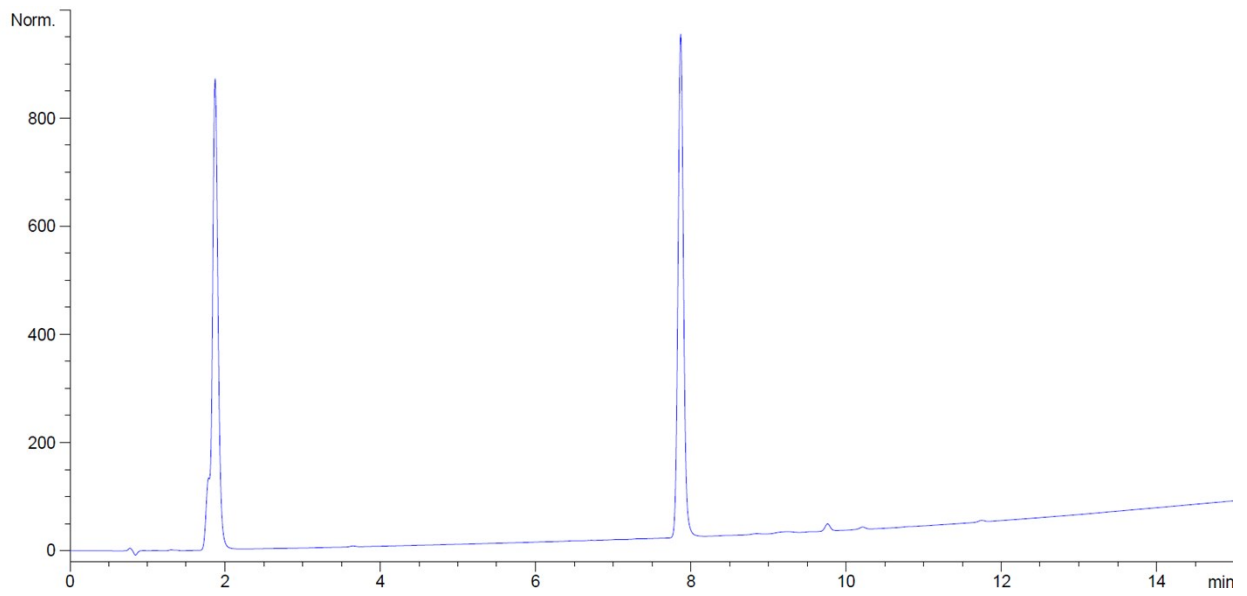

30 min

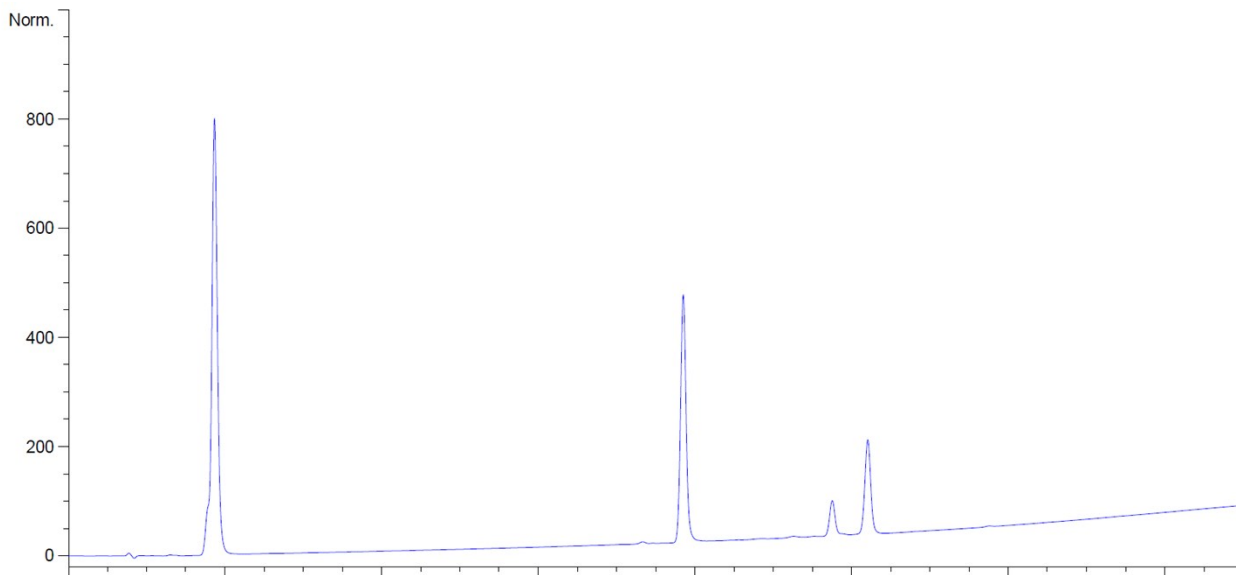

60 min

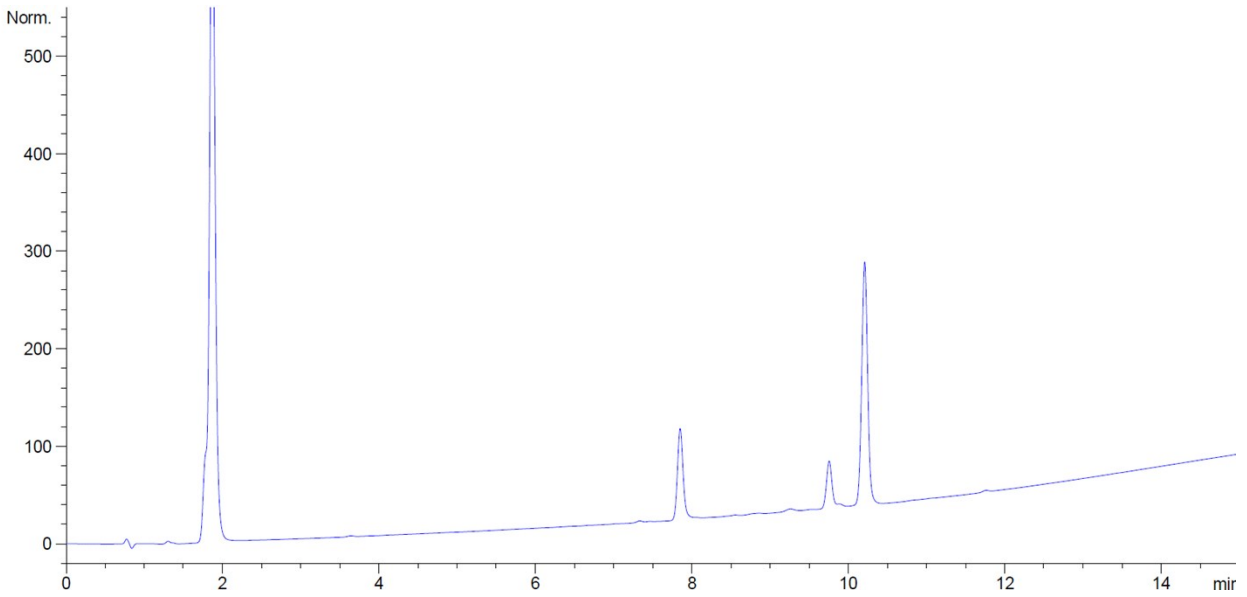

120 min

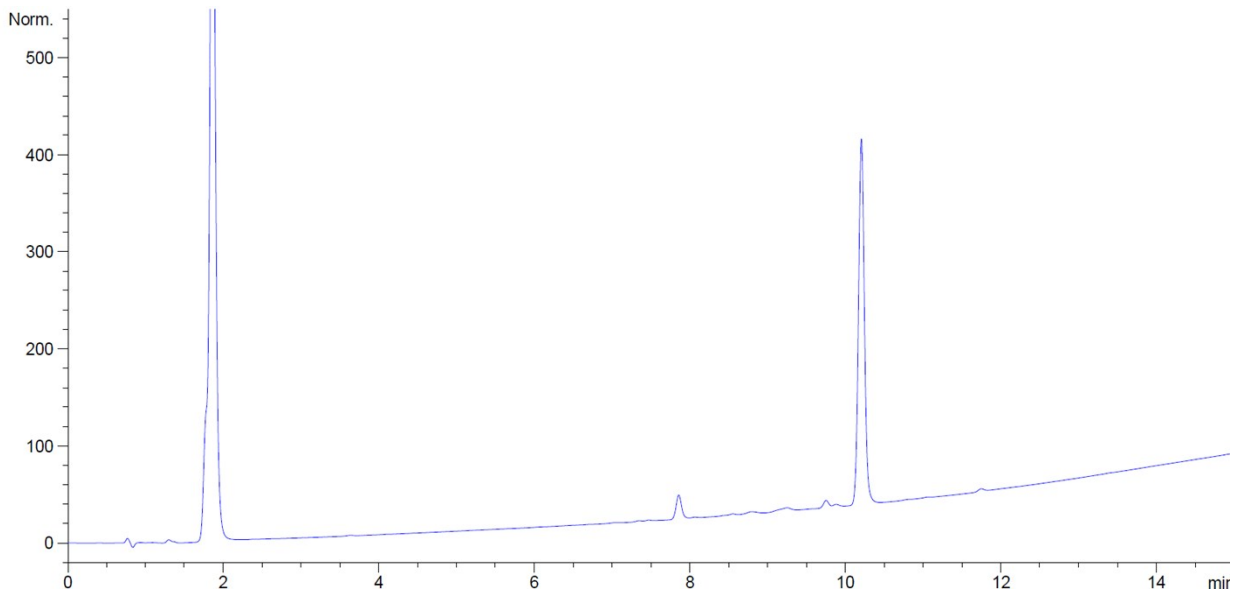

**HPLC-S15.** Fmoc-Arg(Pbf)-OH : DIC : OxymaPure [1:1.2:1], at 45 °C, in NBP, in presence of nucleophile (tripeptidyl resin), In-situ activation, half DIC at 0 min and half DIC + 0.25 equiv. Fmoc-Arg(Pbf)-OH at 30 min, 0.15M.

0 min

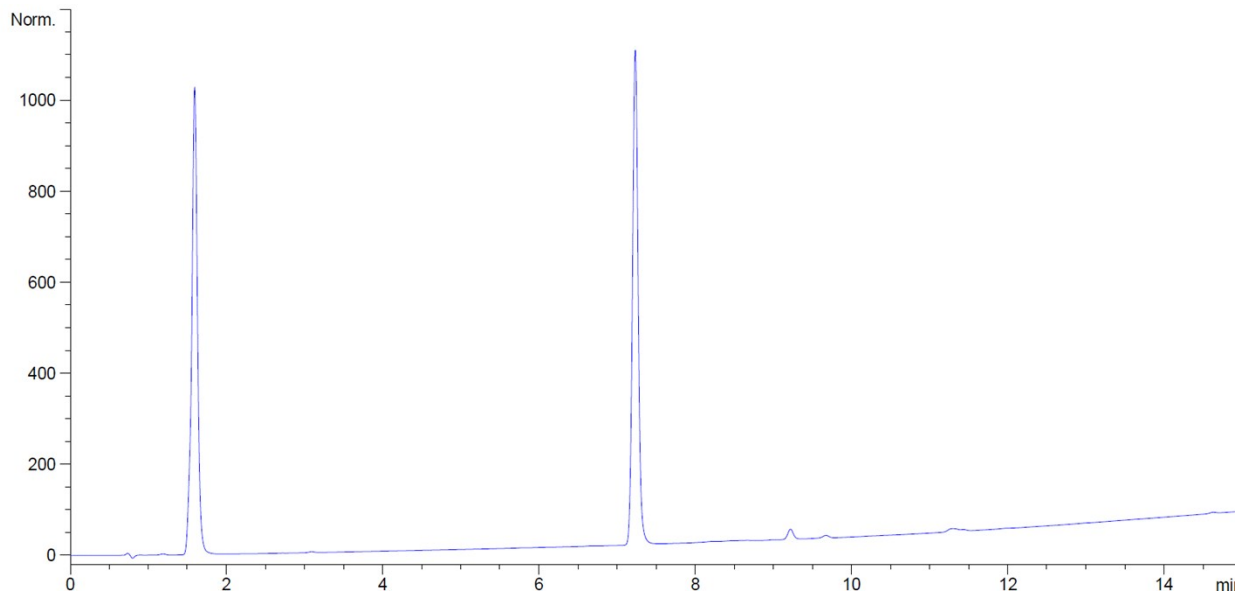

30 min

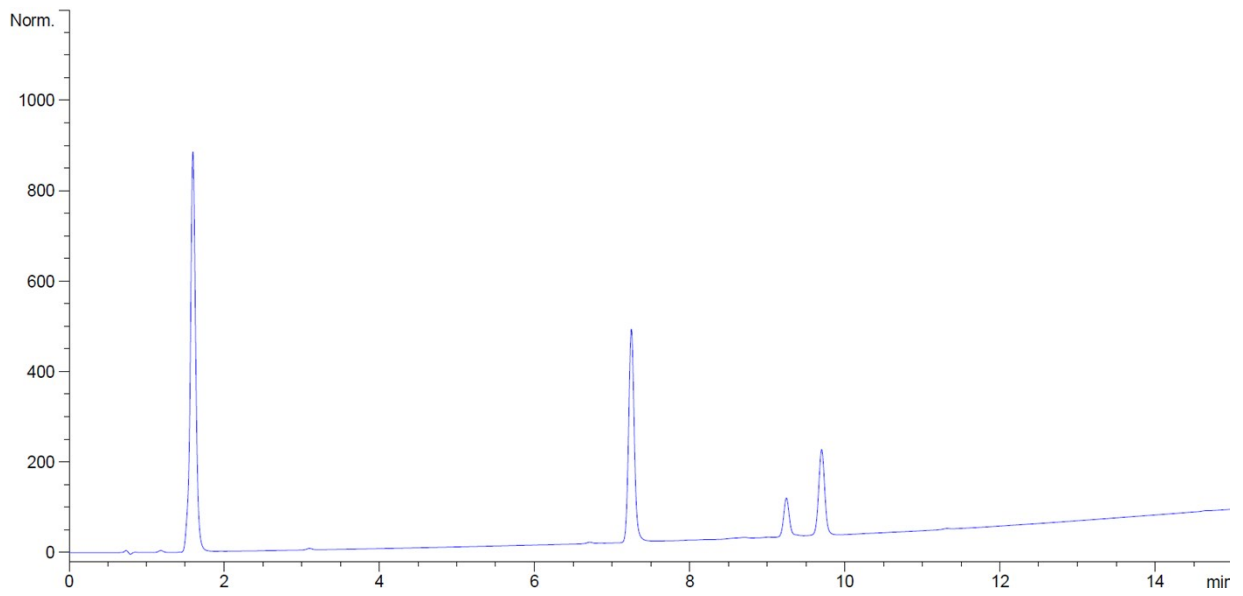

60 min

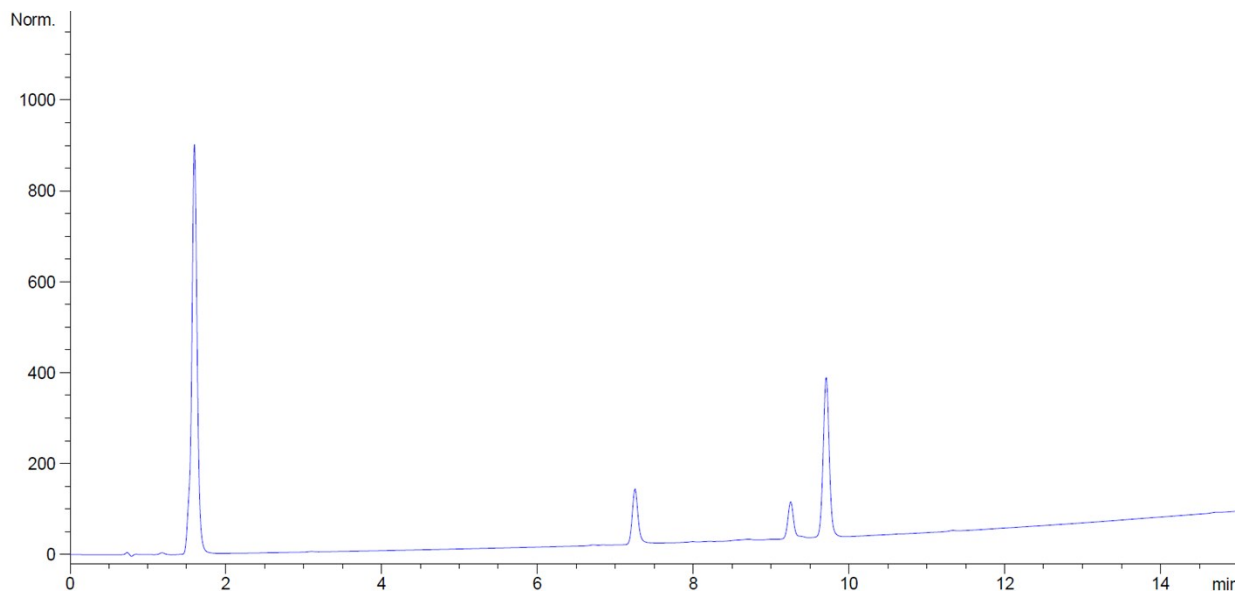

120 min

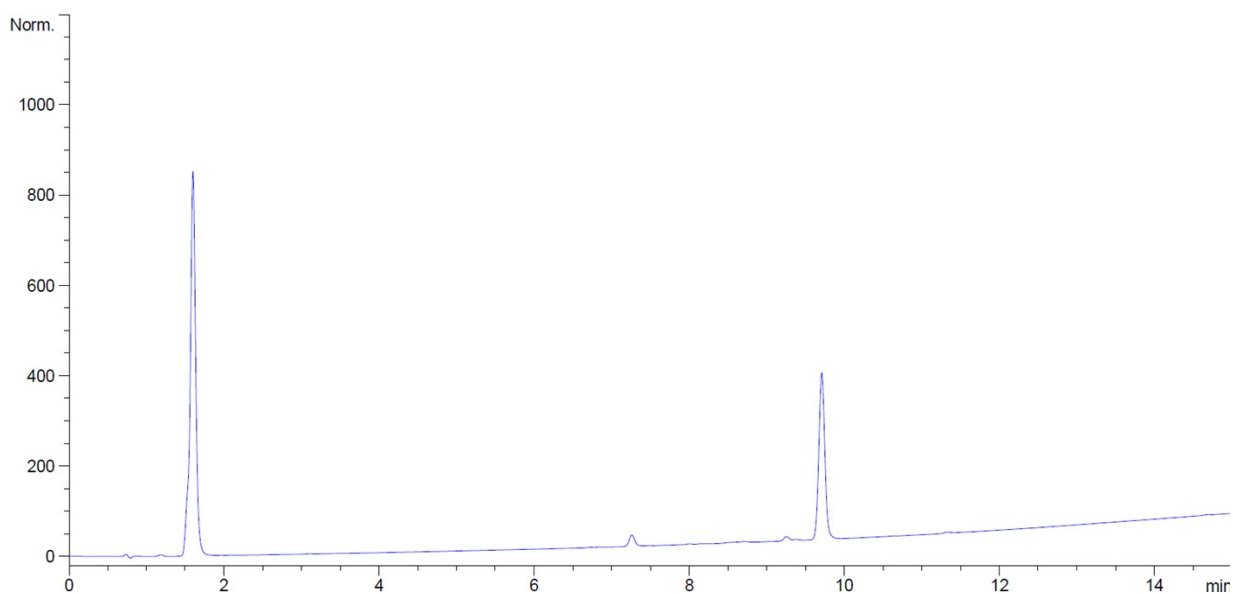

### Coupling quantification

**HPLC-S16.** Coupling quantification of Tripeptide (H-GFL-NH<sub>2</sub>) vs Tetrapeptide (H-RGFL-NH<sub>2</sub>), Fmoc-Arg(Pbf)-OH : DIC : OxymaPure 1.5 eq. x [1:1:1], at RT, DMF.



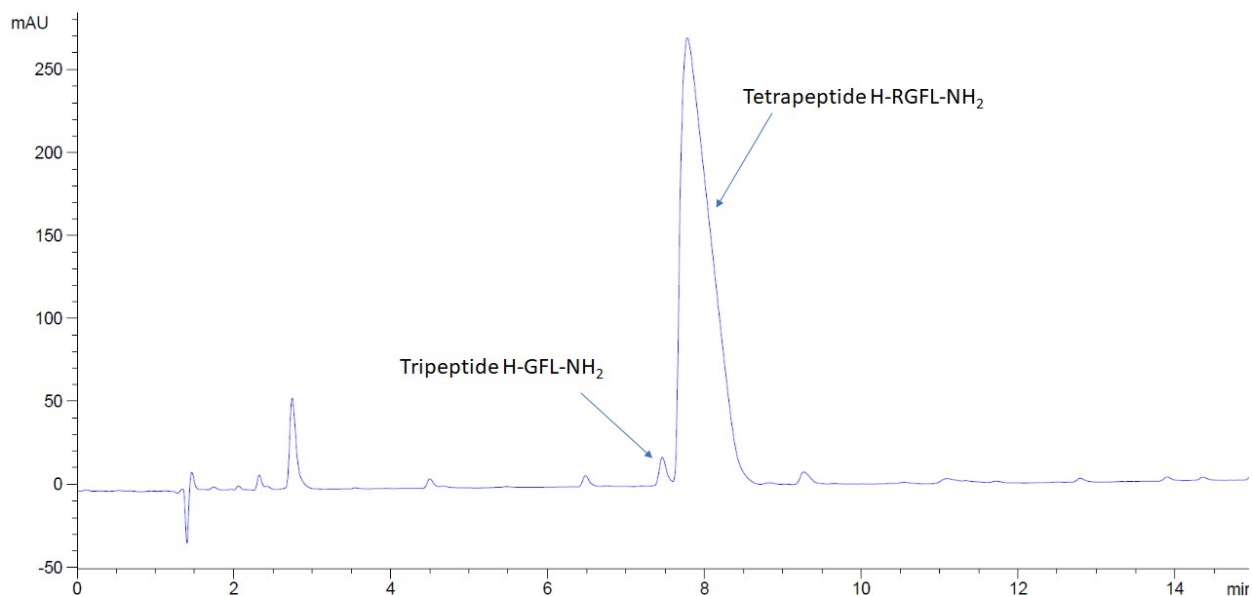

**HPLC-S17.** Coupling quantification of Tripeptide (H-GFL-NH<sub>2</sub>) vs Tetrapeptide (H-RGFL-NH<sub>2</sub>), Fmoc-Arg(Pbf)-OH : DIC : OxymaPure 1.5 eq. x [1:1:1], 45 °C, DMF.

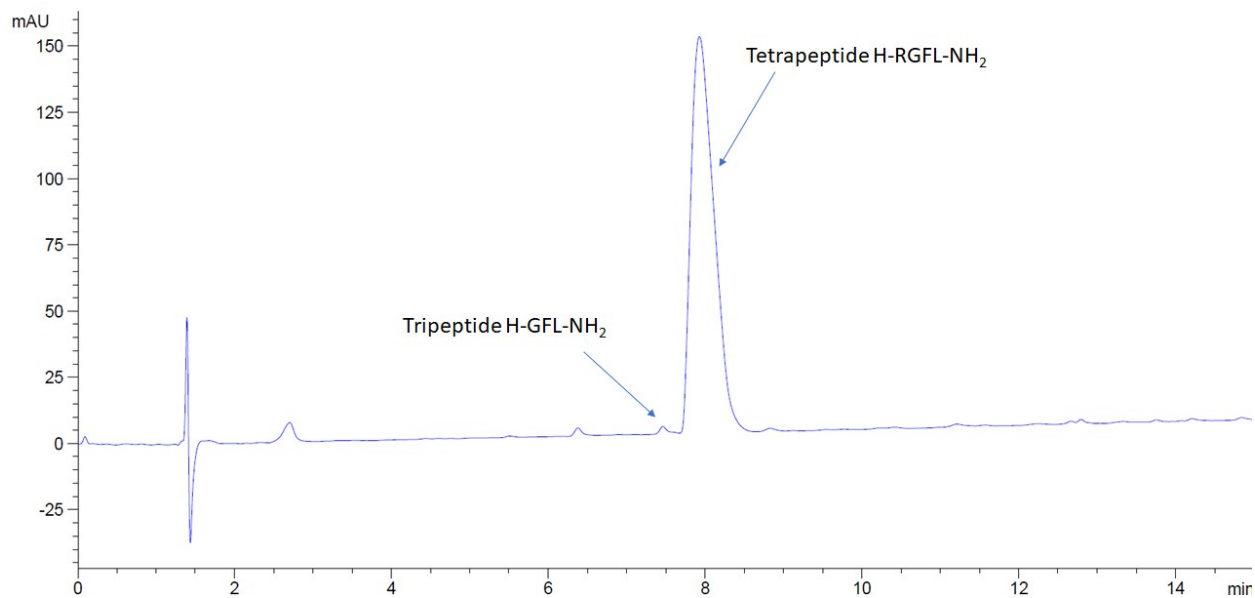

**HPLC-S18.** Coupling quantification of Tripeptide (H-GFL-NH<sub>2</sub>) vs Tetrapeptide (H-RGFL-NH<sub>2</sub>), Fmoc-Arg(Pbf)-OH : DIC : OxymaPure 1.5 eq. x [1:1:1], RT, NBP.

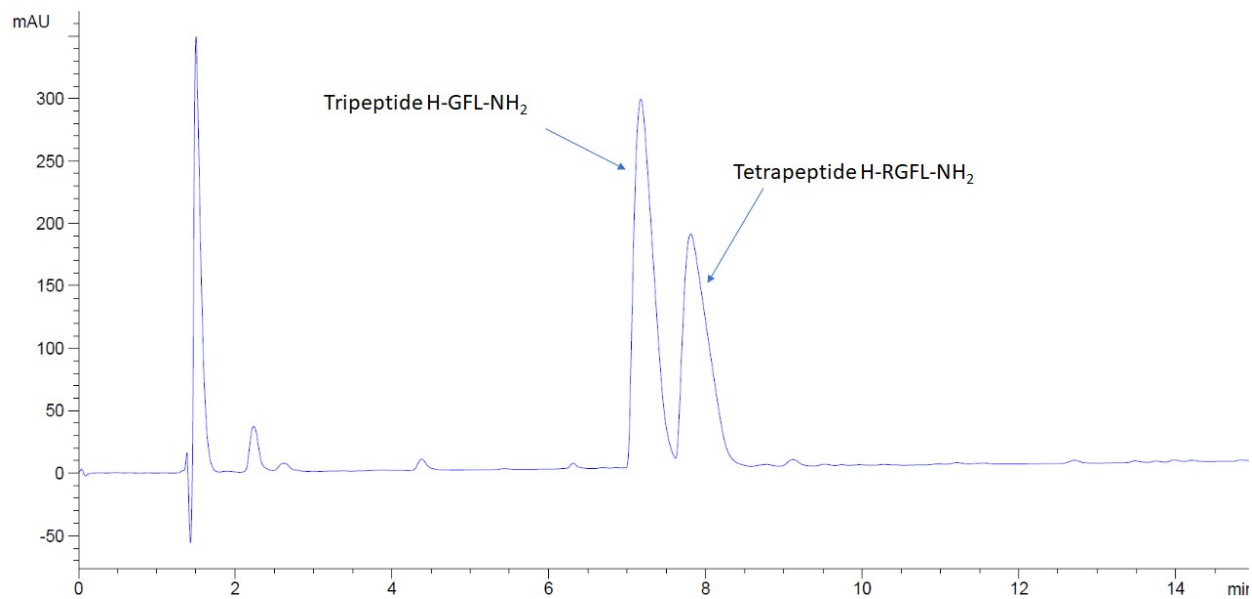

**S19.** Coupling quantification of Tripeptide (H-GFL-NH<sub>2</sub>) vs Tetrapeptide (H-RGFL-NH<sub>2</sub>), Fmoc-Arg(Pbf)-OH : DIC : OxymaPure 1.5 eq. x [1:1:1], 45 °C, NBP.

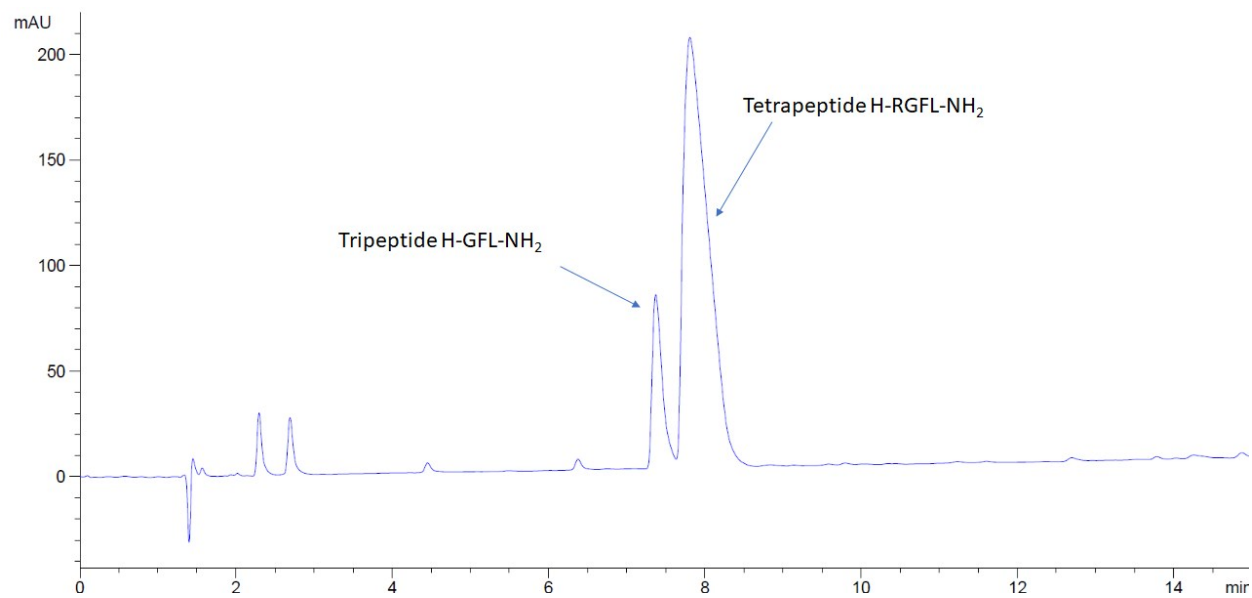

**HPLC-S20.** Coupling quantification of Tripeptide (H-GFL-NH<sub>2</sub>) vs Tetrapeptide (H-RGFL-NH<sub>2</sub>), Fmoc-Arg(Pbf)-OH : DIC : OxymaPure 1.5 eq. x [1:1:1], 60 °C, NBP.

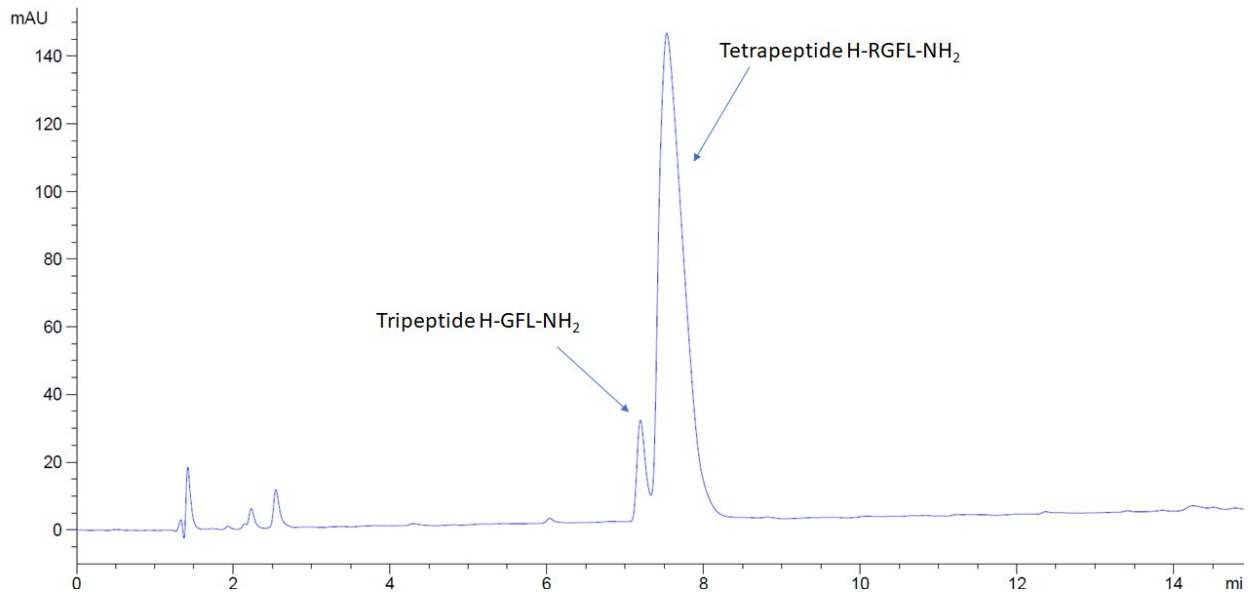

**HPLC-S21.** Coupling quantification of Tripeptide (H-GFL-NH<sub>2</sub>) vs Tetrapeptide (H-RGFL-NH<sub>2</sub>), Fmoc-Arg(Pbf)-OH : DIC : OxymaPure 1.5 eq. x [1:1:1], 45 °C, NBP, Pre-conditioning strategy.

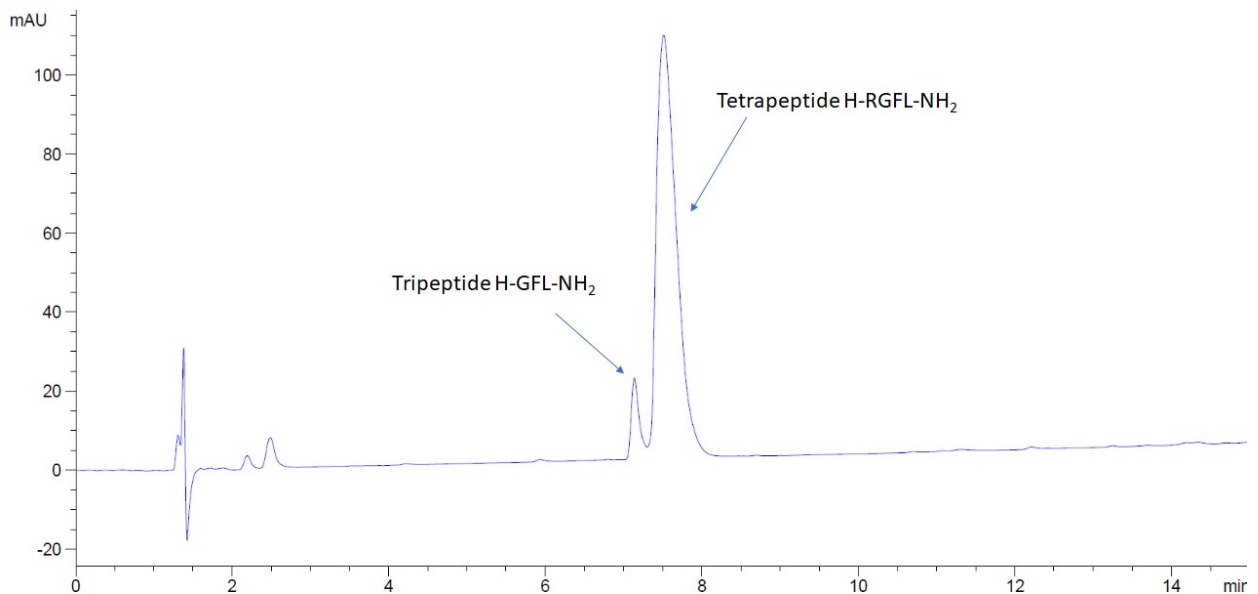

**HPLC-S22.** Coupling quantification of Tripeptide (H-GFL-NH<sub>2</sub>) vs Tetrapeptide (H-RGFL-NH<sub>2</sub>), Fmoc-Arg(Pbf)-OH : DIC : OxymaPure 1.5 eq. x [1:1:1], 45 °C, NBP, In situ Activation, 0.15M.

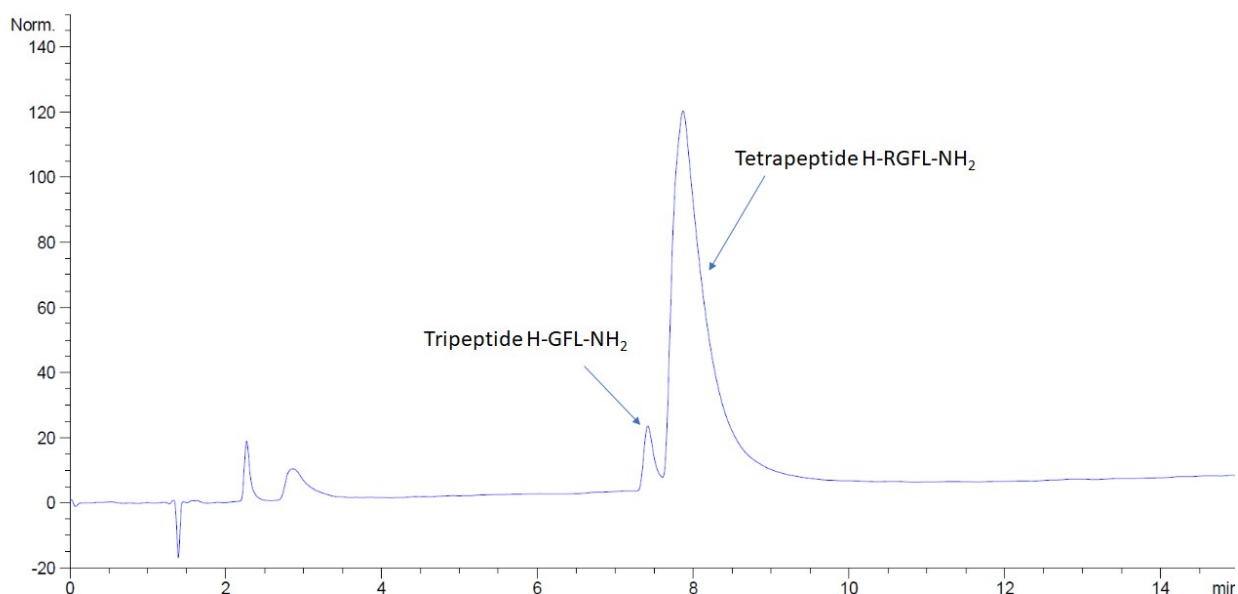

**HPLC-S23.** Coupling quantification of Tripeptide (H-GFL-NH<sub>2</sub>) vs Tetrapeptide (H-RGFL-NH<sub>2</sub>), Fmoc-Arg(Pbf)-OH : DIC : OxymaPure 1.5 eq. x [1:1:1], 45 °C, NBP, In situ Activation, 0.075M.

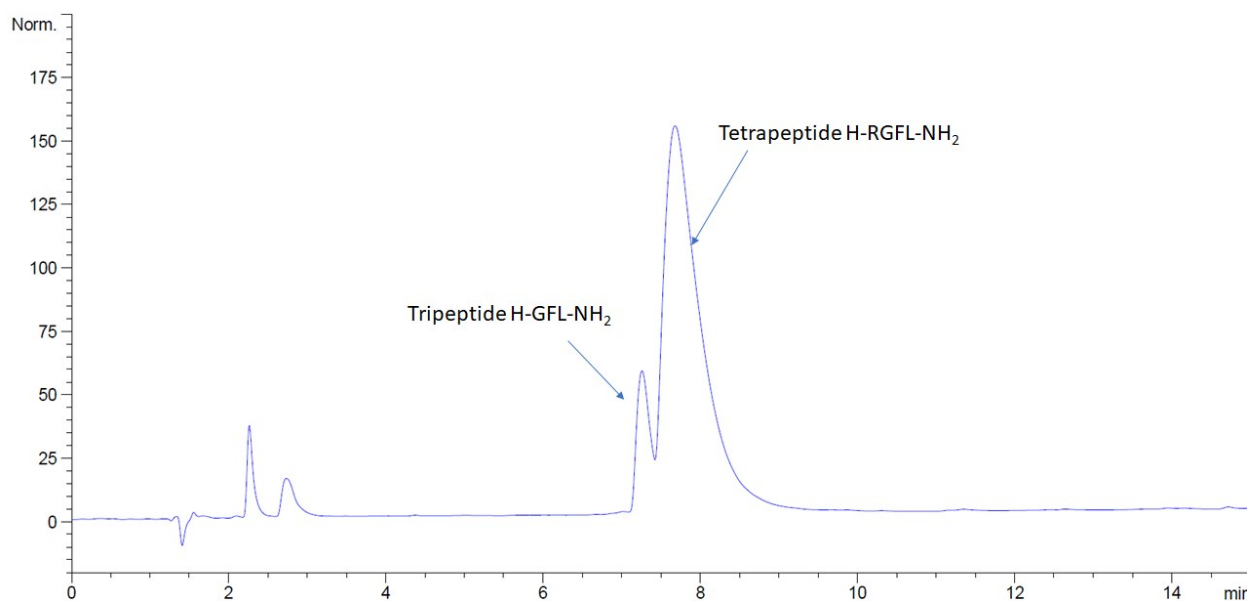

**HPLC-S24.** Coupling quantification of Tripeptide (H-GFL-NH<sub>2</sub>) vs Tetrapeptide (H-RGFL-NH<sub>2</sub>), Fmoc-Arg(Pbf)-OH : DIC : OxymaPure 1.5 eq. x [1:1.2:1], 45 °C, NBP, In situ Activation, 0.075M, half DIC at 0 min + half DIC and 0.25 eq Fmoc-Arf(Pbf)-OH at 30 min.

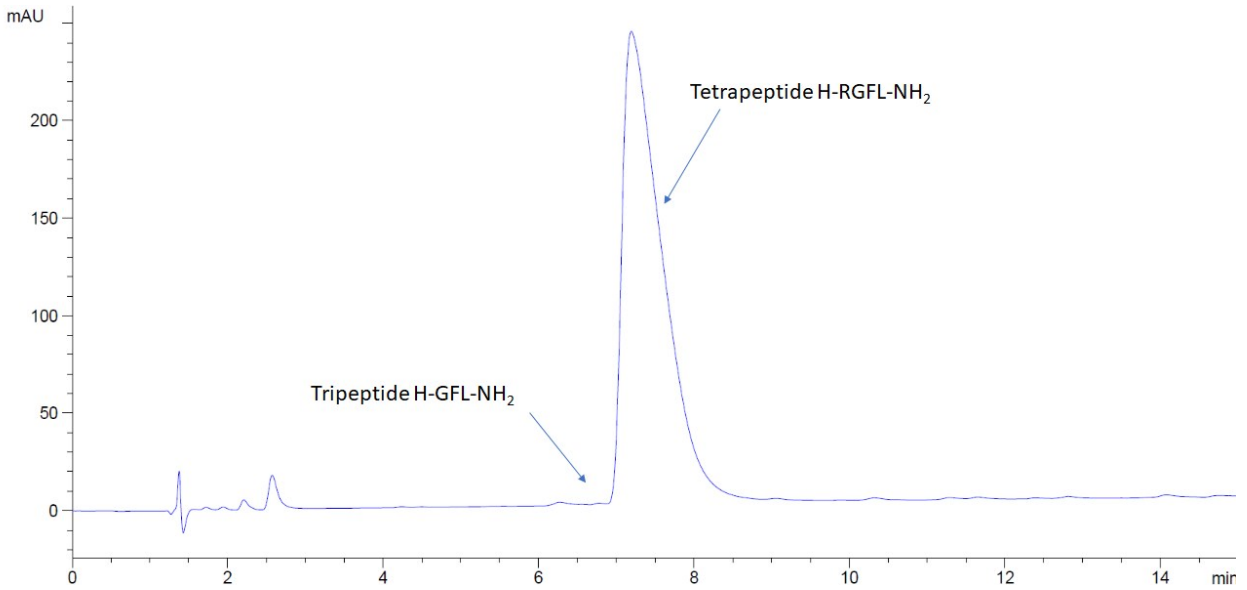

**HPLC-S25.** SPPS of Linear precursor of RGD Peptide (H-DfKRG-OH) in DMF

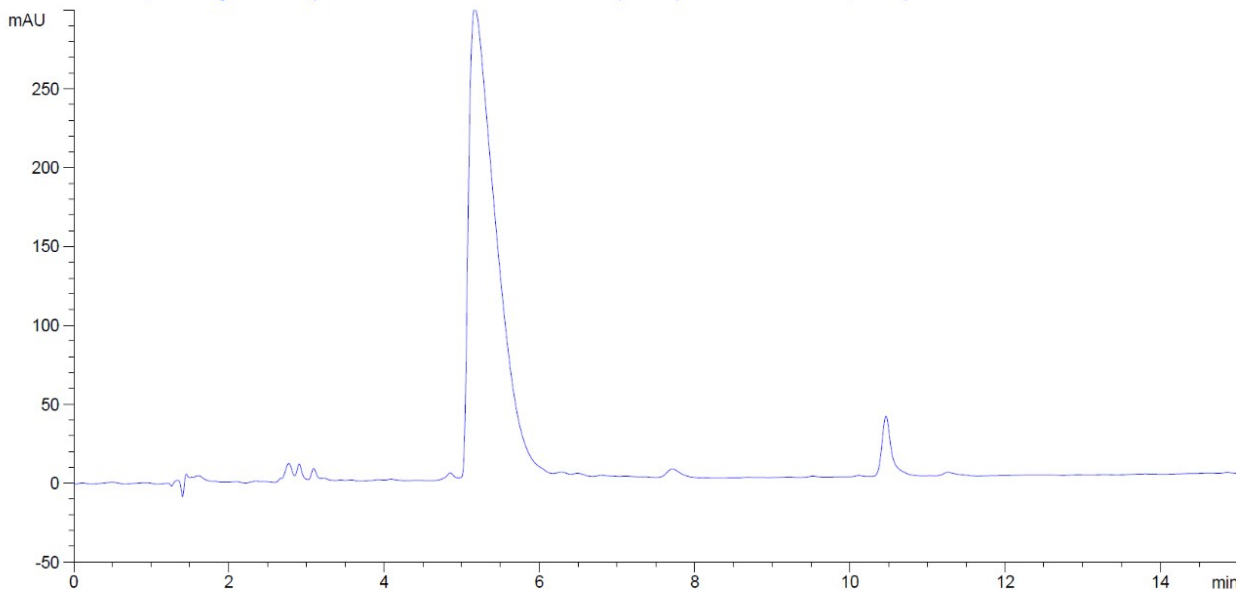

**HPLC-S26.** SPPS of Linear precursor of RGD Peptide (H-DfKRG-OH) in NBP

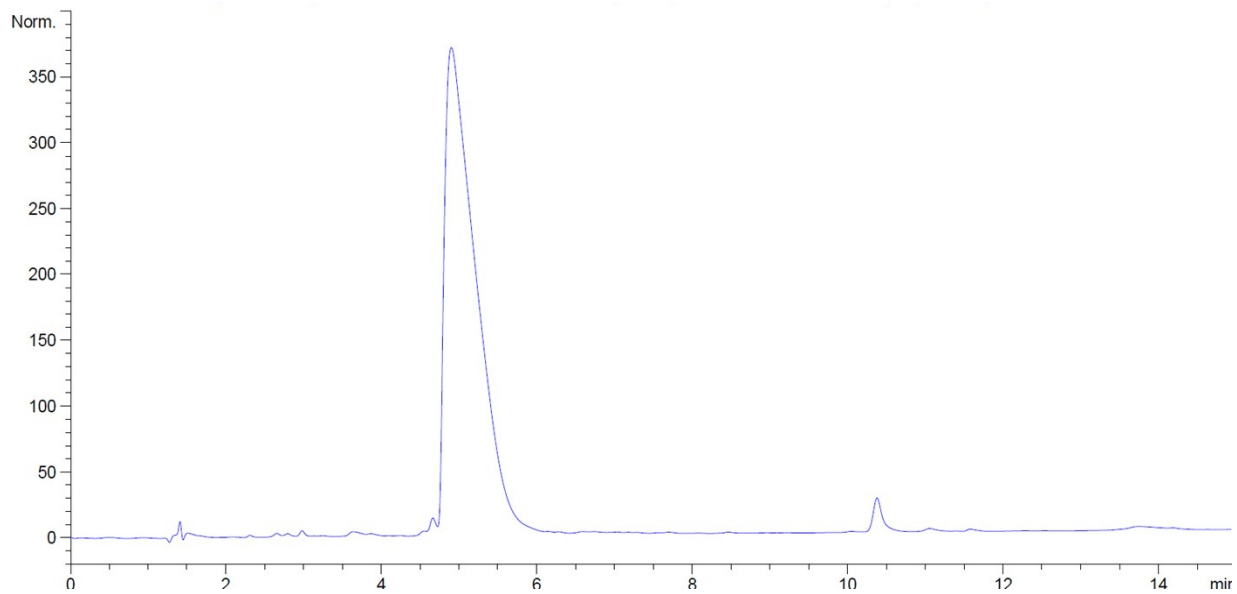

**HPLC-S27. Des-Arg Peptide (H-DfKG-OH) in DMF**

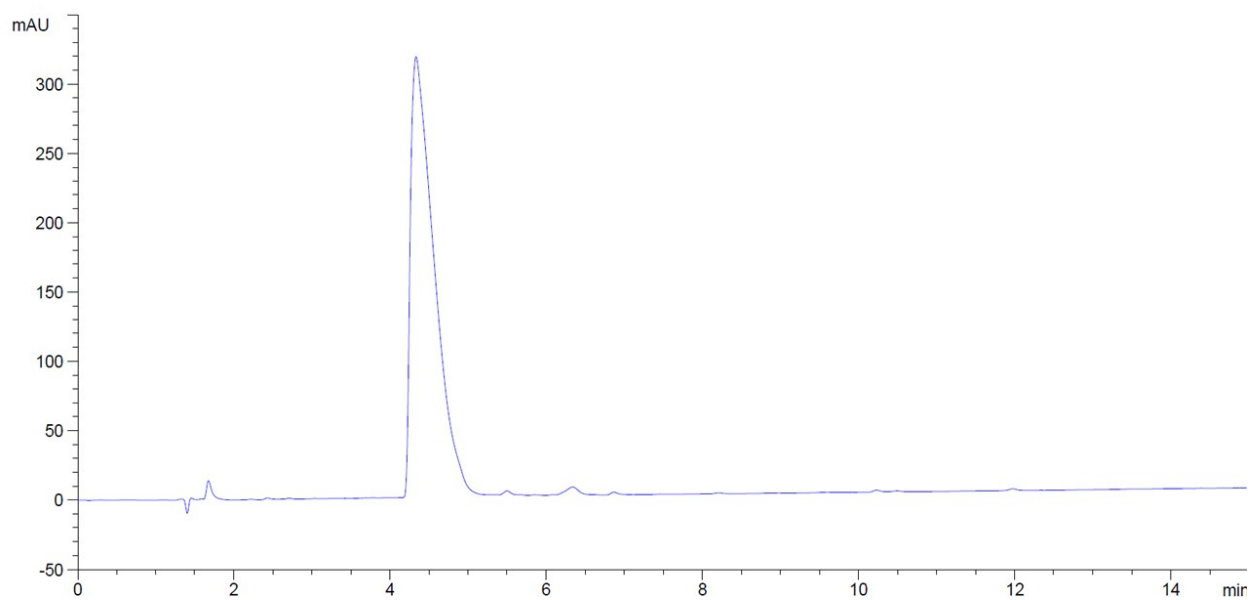

Supplement: c9gc03784e1.pdf [file c9gc03784e1.pdf]
